# Supplementary material for: Induction of the hepatic aryl hydrocarbon receptor by alcohol dysregulates autophagy and phospholipid metabolism via PPP2R2D
Source: PubMed Central journal article supplement (PMC9568535; doi:10.1038/s41467-022-33749-0), 2022-10-14

***SUPPLEMENTARY INFORMATION***

**Induction of the hepatic aryl hydrocarbon receptor by alcohol  
dysregulates autophagy and phospholipid metabolism via PPP2R2D**

Yun Seok Kim, Bongsub Ko, Da Jung Kim, Jihoon Tak, Chang Yeob Han,  
Joo-Youn Cho, Won Kim, and Sang Geon Kim

**Table of contents**

|                            |           |
|----------------------------|-----------|
| Supplementary figures..... | <b>2</b>  |
| Supplementary tables.....  | <b>18</b> |

# SUPPLEMENTARY FIGURES

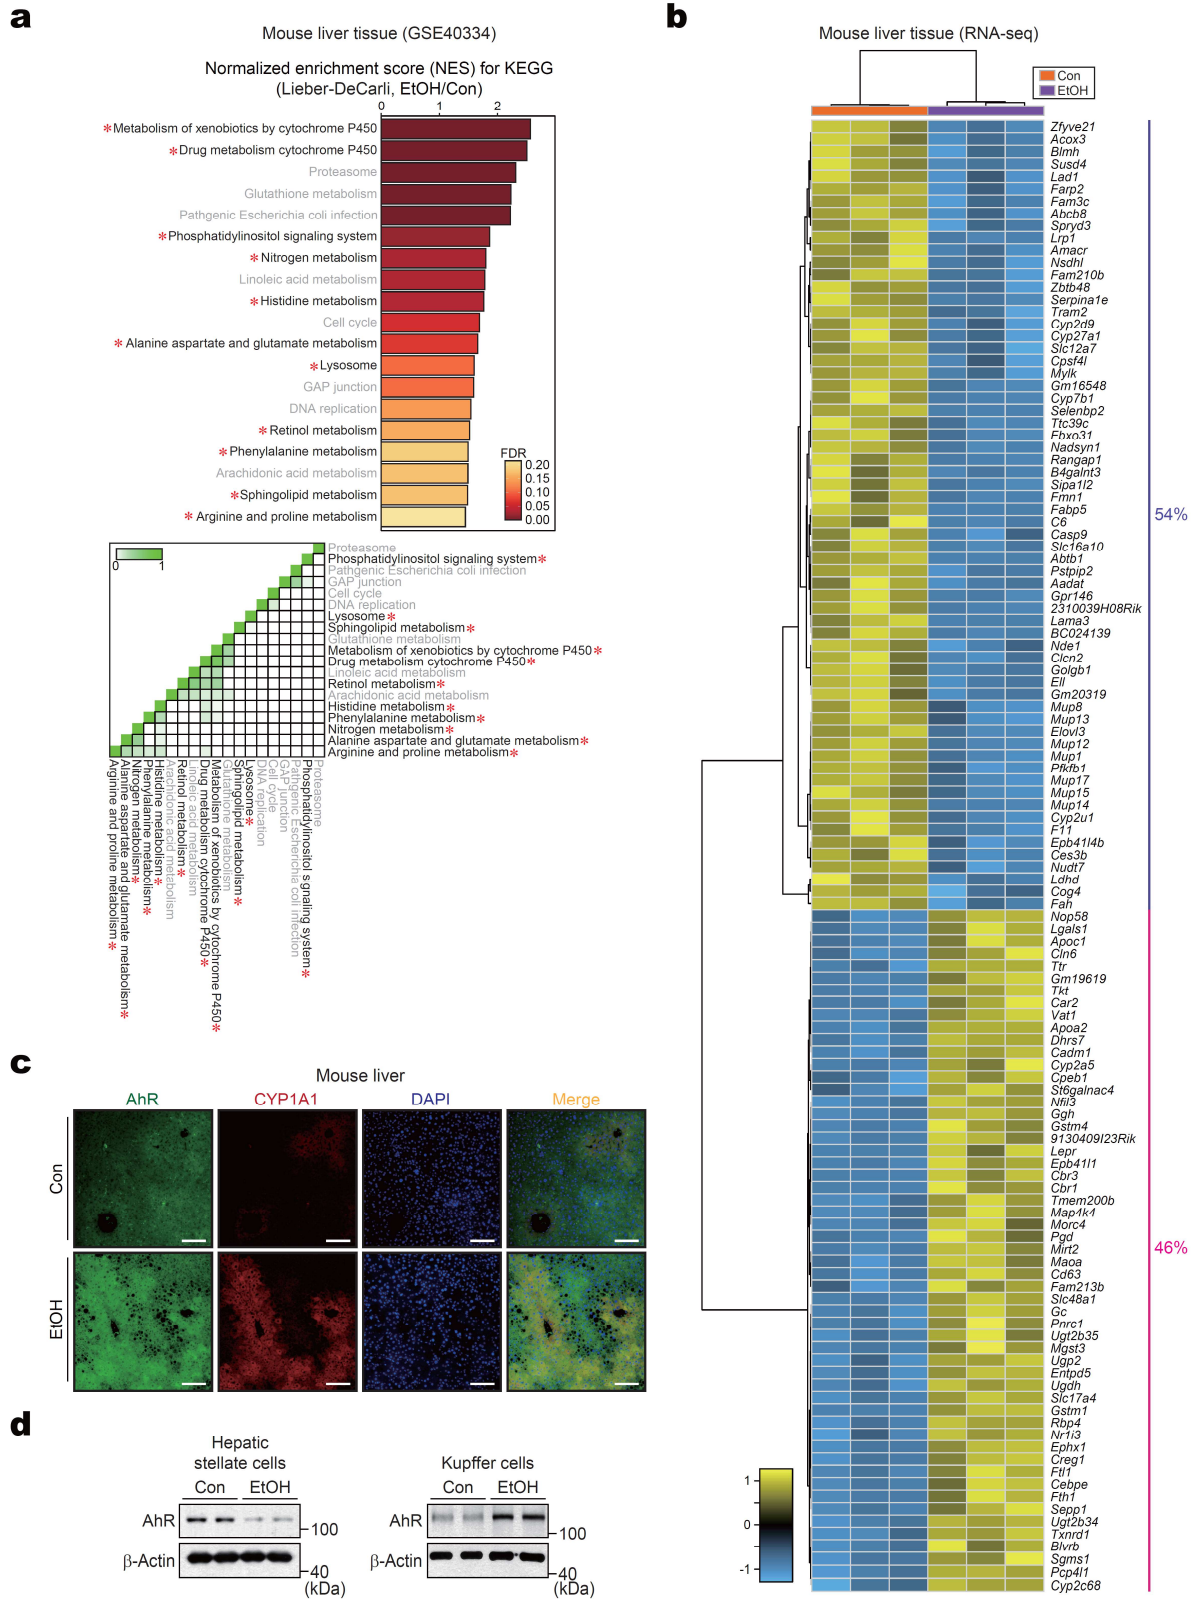

Supplementary Fig. 1 Analyses of alcohol-induced differentially expressed genes (DEGs).

**a** Bar graph (*upper*) and leading-edge analysis (*lower*) of the significantly enriched GSEA KEGG pathway to identify functional processes controlled by alcohol treatment using public transcriptome data (GSE40334; n=4 each). NES and FDR are presented as a bar graph (NES>1.4, FDR<0.25) (*upper*). GSEA leading-edge analysis are presented as a similarity matrix where the intensity of the green color directly correlates with the extent of the intersection between the leading-edge core genes of each gene set combination (*lower*). AhR-related pathways were marked with red asterisks. **b** Heatmap and hierarchical correlation analyses of the top 119 DEGs based on the hepatic transcriptome data using mice fed with either the control diet or a Lieber-DeCarli alcohol liquid diet for 5 weeks (n=3 each; DEGs of FDR<0.05 and absolute FC>1.5). The DEGs were hierarchically clustered and presented as a heatmap according to the row Z score (darker blue, stronger down-regulation; darker yellow, stronger up-regulation). **c** Representative immunofluorescence images of liver sections from the liver of mice fed a control diet or Lieber-DeCarli diet for 4 weeks for AhR (green) and CYP1A1 (red) with DAPI counterstaining (blue) (n=5 each). Scale bar: 100  $\mu$ m. **d** Immunoblot assays for AhR in HSCs (*left*) and Kupffer cells (*right*) isolated from the mice fed as indicated in (**b**). Source data are provided as a Source Data file.

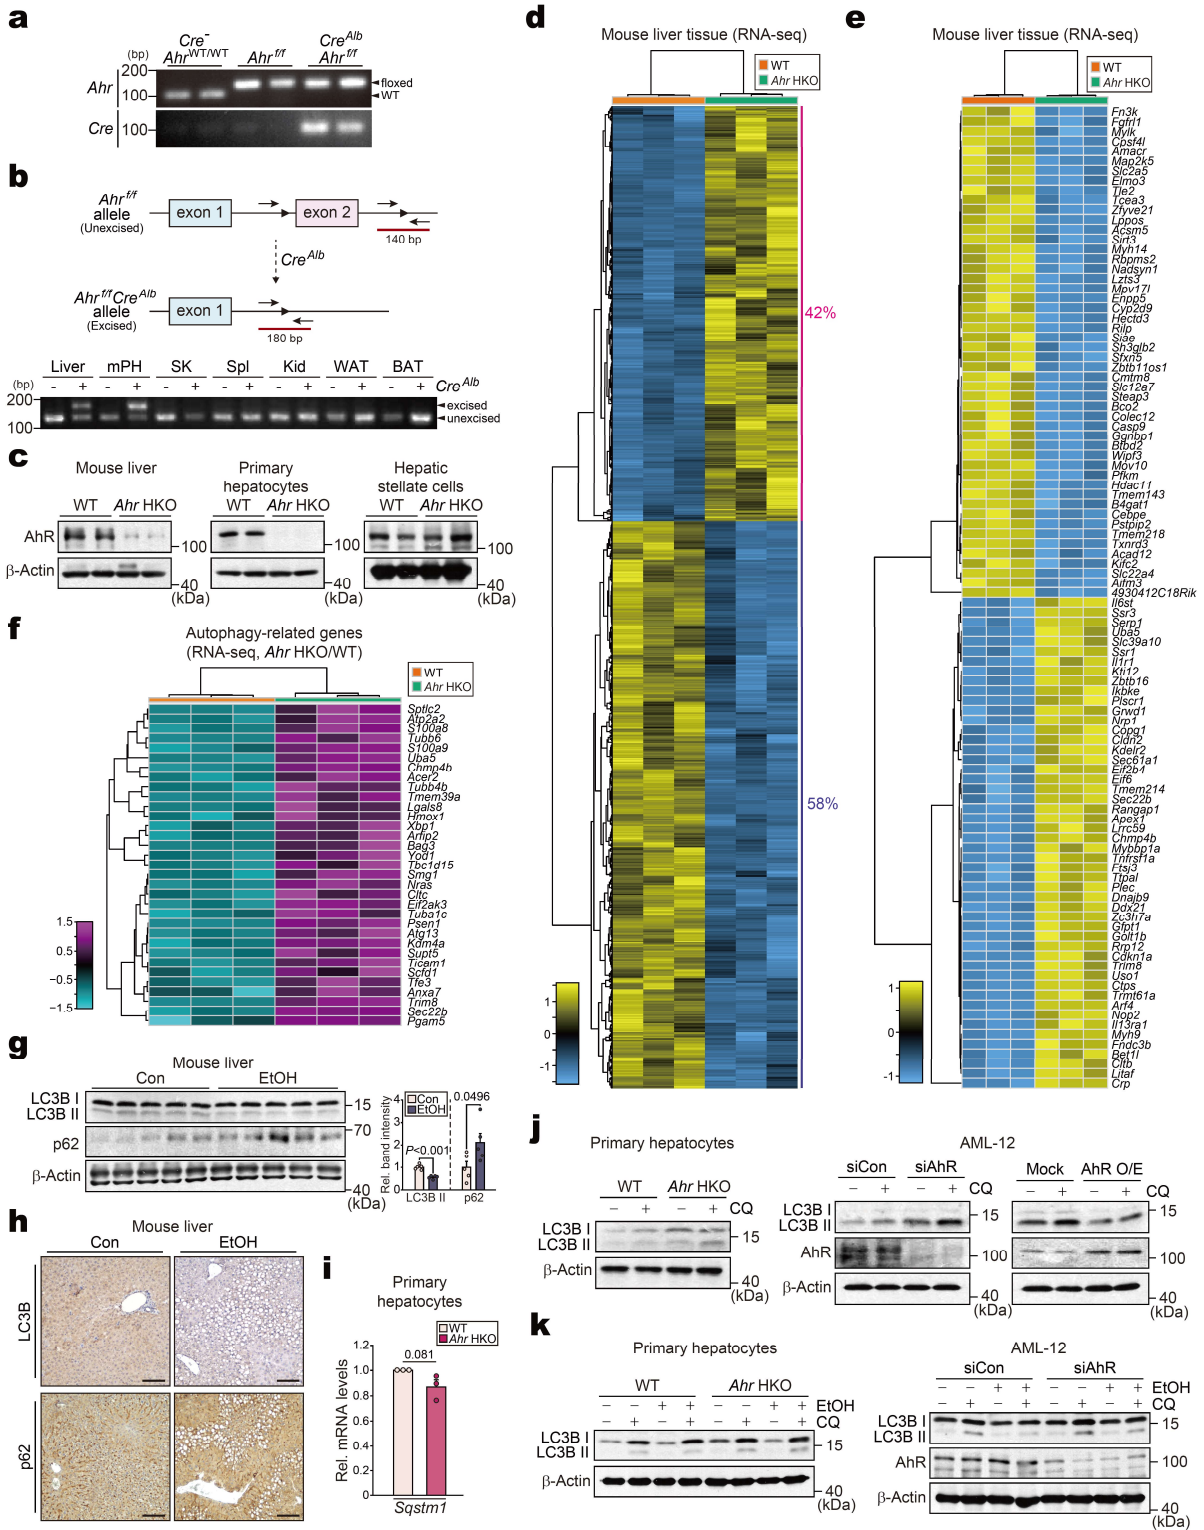

**Supplementary Fig. 2 Effects of alcohol treatment and AhR modulations on autophagy.**

**a** PCR analysis of *Ahr* from genomic DNA extracted from mouse tail ( $n=2$  each; repeated 3 times with similar results). **b** Diagram of the unexcised *Ahr<sup>fl/fl</sup>* and the excised *Ahr<sup>fl/fl</sup> Alb-Cre* alleles (upper) and

PCR analysis (*lower*). The red lines represent the fragment sizes generated via PCR amplification. **c** Immunoblots for AhR in the mouse liver or indicated cells. **d, e** Heatmap and hierarchical correlation analyses of all (**d**) or the top 100 (**e**) DEGs based on the hepatic transcriptome data (n=3 each; DEGs of FDR<0.05 and absolute FC>1.5). The DEGs were hierarchically clustered and presented as a heatmap according to the row Z score (darker blue, stronger down-regulation; darker yellow, stronger up-regulation). **f** Heatmap and hierarchical correlation analyses of 33 DEGs related to autophagy pathways. The DEGs were hierarchically clustered and presented as heatmap according to the row Z score (darker green, stronger down-regulation; darker red, stronger up-regulation). **g** Immunoblots for LC3B I/II and p62 in liver homogenates from the mice subjected to the control diet or a Lieber-DeCarli alcohol liquid diet for 4 weeks (*left*) and their quantifications (*right*) (n=5 each). **h** Representative immunohistochemical images for LC3B and p62 using the same mice as in (**g**) (n=5 each). Scale bar: 100  $\mu$ m. **i** qRT-PCR assays for *Sqstm1* in mPHs isolated from the indicated mice (n=3 each). **j** Immunoblots for LC3BI/II in mPHs treated with 10  $\mu$ M CQ for 2 h (*left*) or AML-12 cells treated with 10  $\mu$ M CQ for 2 h after transfection with siAhR or AhR plasmids for 24 h (*right*) (repeated 3 times with similar results). **k** Immunoblots for LC3BI/II in mPHs treated with 100 mM ethanol for 48 h (*left*) or AML-12 cells treated with 100 mM ethanol for 48 h after transfection with siAhR for 24 h (*right*). Then, both cells were continuously exposed to 10  $\mu$ M CQ for 2 h (repeated 3 times with similar results). Values are expressed as means  $\pm$  SEM. Significantly different compared to WT or Con. Data were analyzed via two-tailed Student's t-test (**g** and **i**). Source data are provided as a Source Data file.

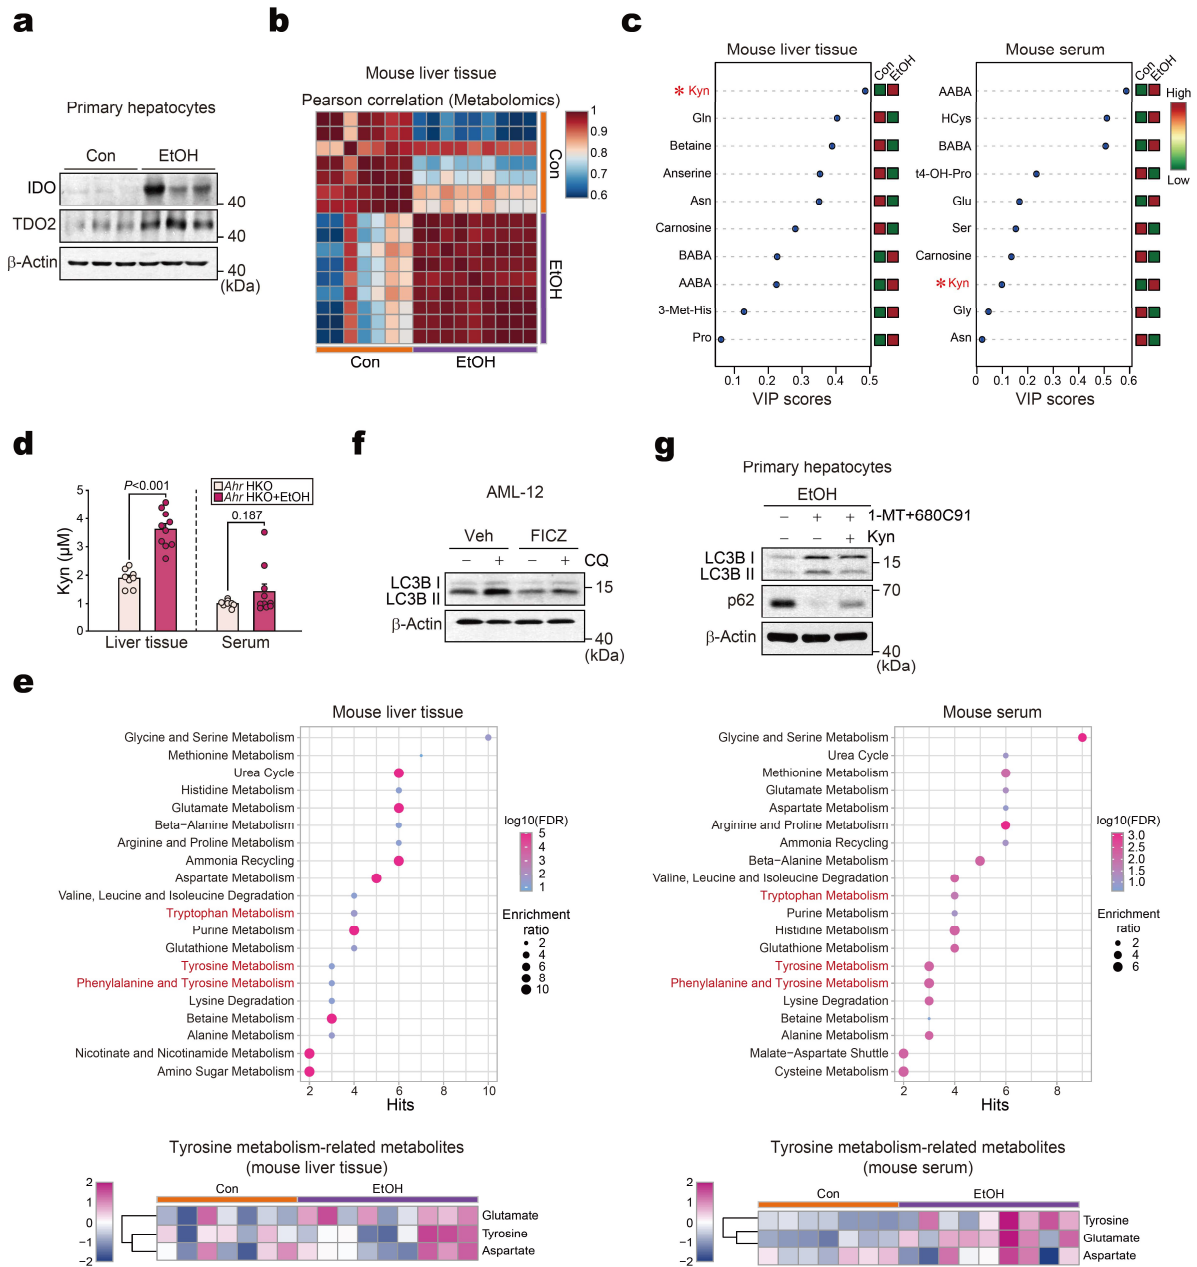

**Supplementary Fig. 3 Alcohol effects on tryptophan-metabolizing enzymes and metabolomic profiles of kynurenine production, and FICZ effect on autophagy.**

**a** Immunoblots assays for IDO and TDO2 in the lysates of mPHs isolated from the mice fed with either a control diet or Lieber-DeCarli alcohol liquid diet for 5 weeks (n=3 each). **b** Heatmap of Pearson correlation matrix based on the amino acid-related metabolomics data using the liver of mice fed as indicated in (a) (n=7, 9 mice; darker blue, closer negative correlation; darker red, closer positive

correlation). **c** VIP score plots using the amino acid-related metabolomics data obtained from the liver (*left*) and serum (*right*) of mice fed as indicated in (**a**) (n=7, 9 mice). The left part lists significant differences of metabolites; and the middle part presents the top 10 VIP scores. Each heatmap on the right shows the concentrations of the metabolites. **d** Concentrations of kynurenine in the liver (*left*) and serum (*right*) of the *Ahr* HKO mice fed as indicated in (**a**) (n=8, 10 mice). **e** Metabolic pathways generated by MSEA using the same data as in (**c**) (*upper*) and heatmap of amino acids associated with tyrosine pathways from MSEA (*lower*) (n=7, 9 mice; darker blue, closer negative correlation; darker red, closer positive correlation). **f** Immunoblots for LC3B I/II in AML-12 cells treated with 100 nM FICZ for 4 h and continuously exposed to 10  $\mu$ M CQ for 2 h (repeated 3 times with similar results). **g** Immunoblots for LC3B I/II and p62 in mPHs isolated from the mice fed as indicated in (**a**). mPHs were treated with 1 mM 1-methyl-D-tryptophan (1-MT, an IDO inhibitor) and 20  $\mu$ M 680C91 (a TDO2 inhibitor) in combination with 100  $\mu$ M kynurenine (or vehicle) for 24 h (repeated 3 times with similar results). Values are expressed as means  $\pm$  SEM. Significantly different compared to Con. Data were analyzed via two-tailed Student's t-test (**d**). Source data are provided as a Source Data file.

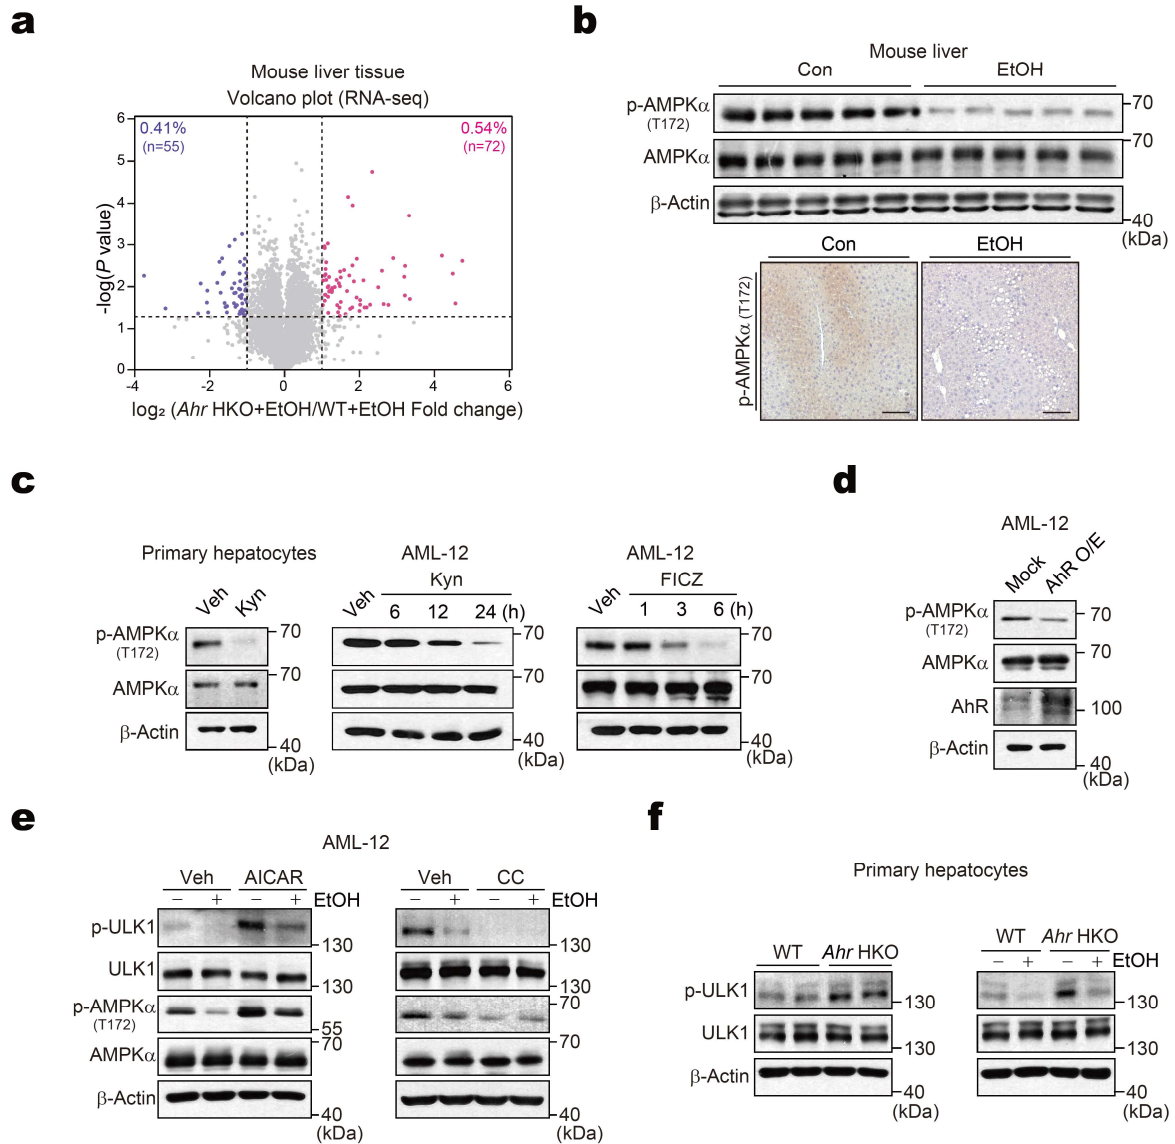

**Supplementary Fig. 4 Effects of alcohol and AhR agonist treatment on p-AMPK $\alpha$  level.**

**a** Volcano plot of DEGs in *Ahr* HKO versus the WT hepatic transcriptome data obtained from WT and *Ahr* HKO mice fed with the Lieber-DeCarli alcohol liquid diet for 5 weeks (n=3 each; blue, down-regulation; red, up-regulation; DEGs of  $P < 0.05$  and absolute FC > 2). **b** Immunoblots (*upper*) and representative immunohistochemical images (*lower*) for p-AMPK $\alpha$  in the liver homogenates from the mice fed with the control or Lieber-DeCarli alcohol liquid diet for 4 weeks (n=5 each). Scale bar: 100  $\mu\text{m}$ . **c, d** Immunoblots from lysates of mPHs treated with 100  $\mu\text{M}$  kynurenine for 12 h (*left*) or AML-12 cells treated with 100  $\mu\text{M}$  kynurenine (*middle*) or 100 nM FICZ (*right*) for the indicated times (**c**;



repeated 3 times with similar results); AML-12 cells transfected with AhR plasmids for 24 h (**d**; repeated 3 times with similar results). **e** Immunoblots from lysates of AML-12 cells treated with 100 mM ethanol for 24 h and continuously exposed to 100  $\mu$ M 5-aminoimidazole-4-carboxamide riboside (AICAR, an AMPK activator) (*left*) or 10  $\mu$ M Compound C (CC, an AMPK inhibitor) (*right*) for 24 h (repeated 3 times with similar results). **f** Immunoblots from lysates of mPHs isolated from WT or *Ahr* HKO mice (*left*) or those treated with 100 mM ethanol for 48 h (*right*) (repeated 3 times with similar results). The data were analyzed via independent two-tailed t-test without adjustment (**a**). Source data are provided as a Source Data file.

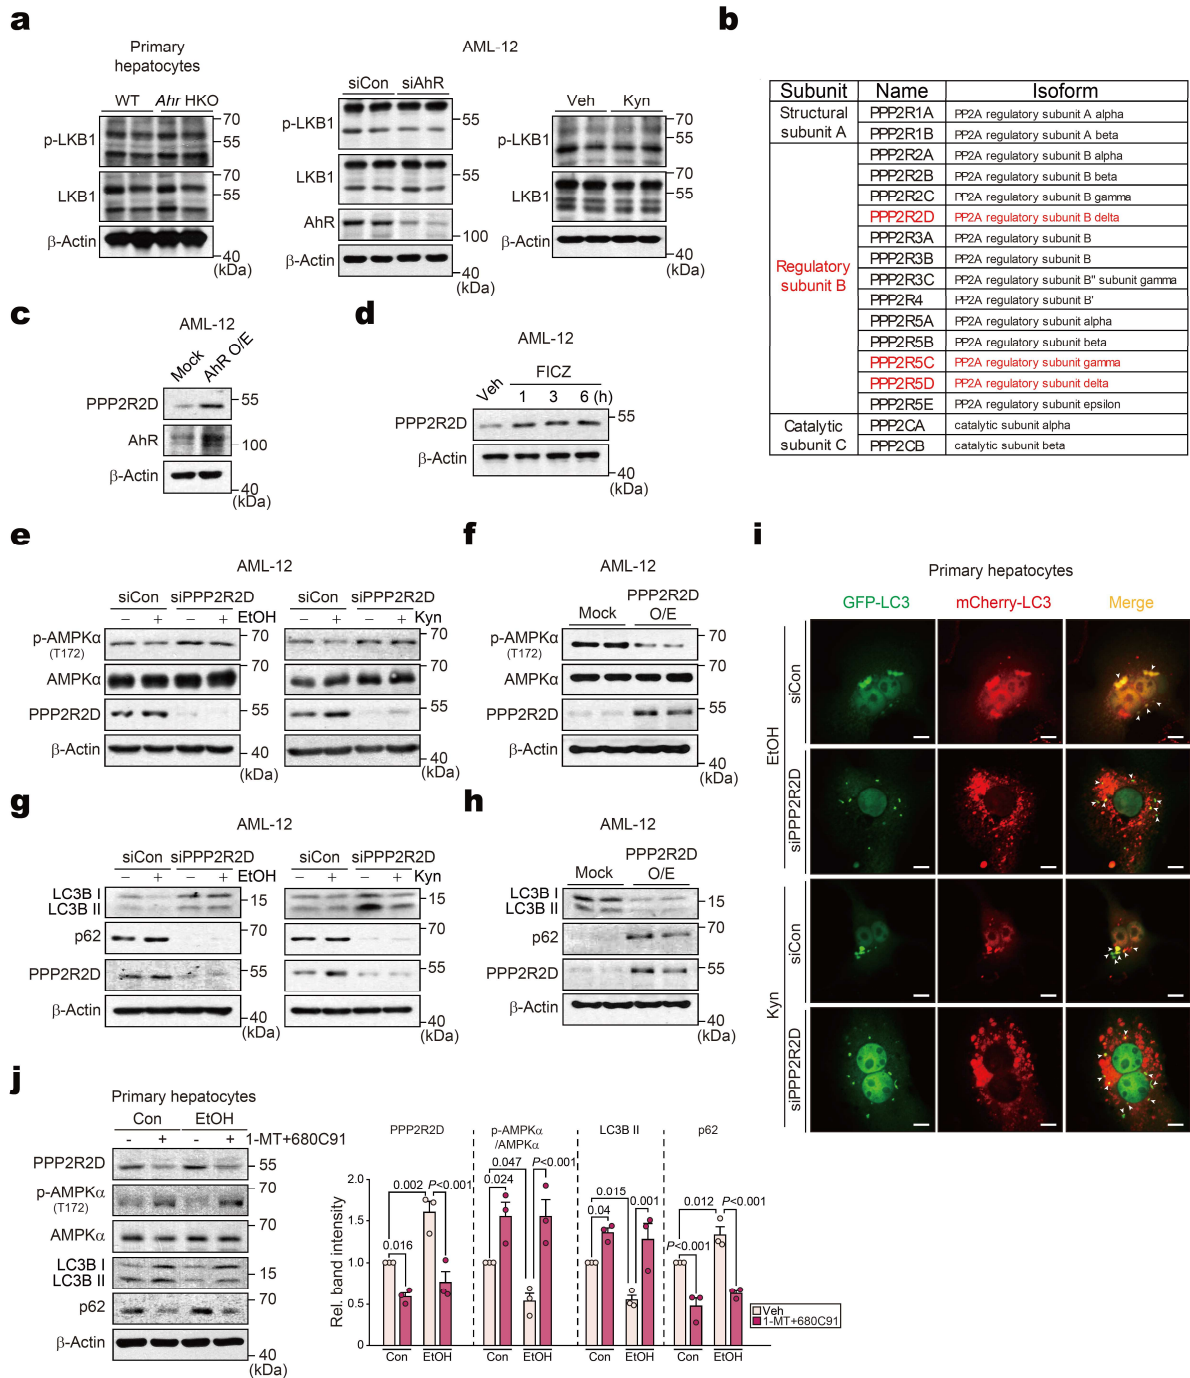

**Supplementary Fig. 5 Effects of AhR modulations on PPP2R2D levels.**

**a** Immunoblots for p-LKB1 in the lysates of mPHs (*left*); or AML-12 cells transfected with siAhR for 24 h (*middle*) or those treated with 100  $\mu$ M kynurenine (*right*) for 12 h (repeated 3 times with similar results). **b** Isoforms of each functional PP2A subunits. **c, d** Immunoblots for PPP2R2D in the lysates of AML-12 cells transfected with AhR plasmids for 24 h (**c**; repeated 3 times with similar results); or those

treated with 100 nM FICZ for the indicated times (**d**; repeated 3 times with similar results). **e, f** Immunoblots for p-AMPK $\alpha$  in the lysates of AML-12 cells treated with 100 mM ethanol for 48 h (*left*) or 100  $\mu$ M kynurenine for 12 h (*right*) after transfection with siPPP2R2D for 24 h (**e**; repeated 3 times with similar results) or those transfected with PPP2R2D plasmids for 24 h (**f**; repeated 3 times with similar results). **g, h** Immunoblots for autophagy markers in the same lysates as in (**e**) or (**f**) (repeated 3 times with similar results). **i** Representative confocal microscopic images of mCherry/GFP-LC3B puncta staining. To collect confocal images of yellow (autophagosomes) or red (autolysosome) puncta, the mPHs were infected with Ad-mCherry-GFP-LC3B for 12 h, then transfected with siPPP2R2D for 12 h followed by exposure to 100 mM ethanol for 48 h or 100  $\mu$ M kynurenine for 12 h (repeated 3 times with similar results). Scale bar: 10  $\mu$ m. **j** Immunoblots from lysates of mPHs isolated from the mice fed a control diet or Lieber-DeCarli diet for 5 weeks. mPHs were treated with 1 mM 1-methyl-D-tryptophan (1-MT, an IDO inhibitor) and 20  $\mu$ M 680C91 (a TDO2 inhibitor) for 24 h (n=3 each). Values are expressed as means  $\pm$  SEM. Significantly different compared to Veh. The data were analyzed via one-way ANOVA with LSD (**j**). Source data are provided as a Source Data file.

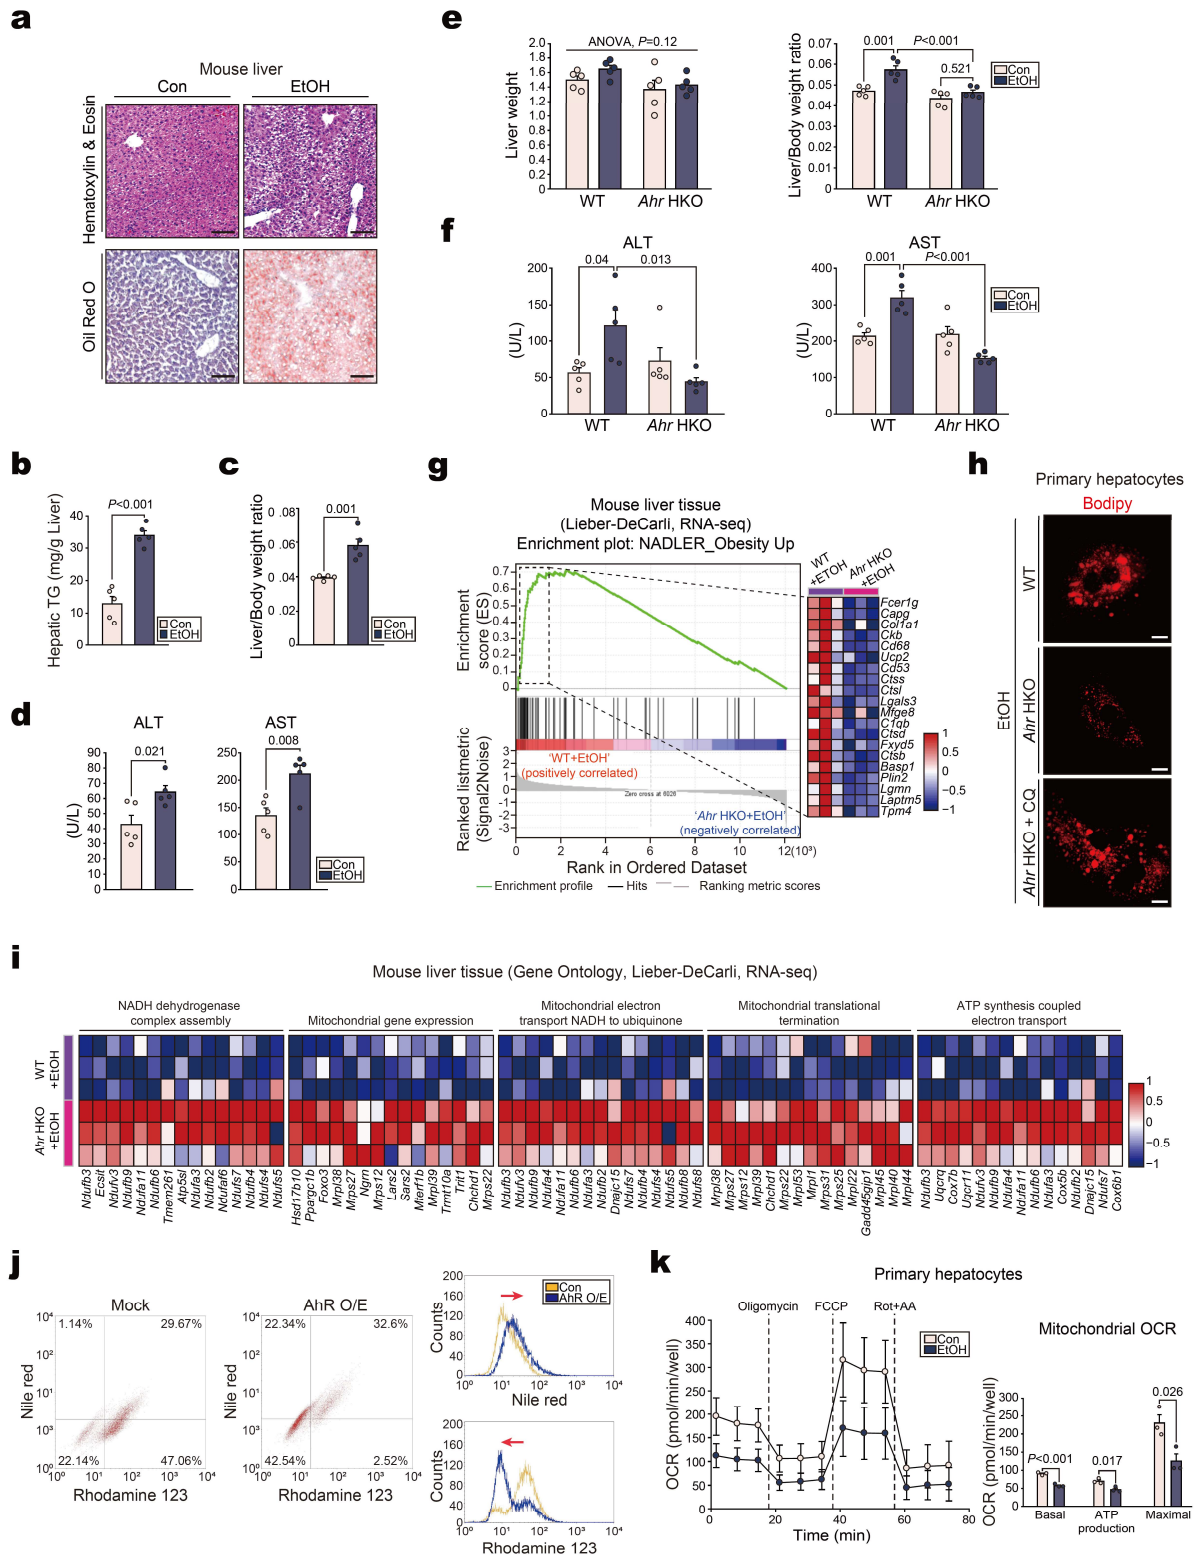

**Supplementary Fig. 6 Inhibition of liver injury by AhR ablation in a Lieber-DeCarli mouse model.**

**a** Representative H&E (*upper*) or oil red O (*lower*) staining of the livers of WT mice fed with a control

diet or Lieber-DeCarli alcohol liquid diet for 4 weeks (n=5 each). Scale bar: 100  $\mu$ m. **b-d** Hepatic TG contents, liver-to-body weight ratios, and serum ALT and AST activities in the same mice as in **(a)**. **e**, **f** Liver weight and liver-to-body weight ratios (**e**) and serum ALT and AST activities (**f**) in WT or *Ahr* HKO mice fed with either control or Lieber-DeCarli alcohol liquid diets for 5 weeks (n=5 each). **g** GSEA-enrichment ‘Obesity Up’ plot using hepatic transcriptome data that was positively correlated with the results of the WT+Lieber-DeCarli alcohol liquid diet (NES=2.49, FDR<0.0001). The top 20 genes that comprise the leading edge of the enrichment score are shown in the corresponding heat map (n=3 each; darker blue, stronger down-regulation; darker red, stronger up-regulation). **h** Representative confocal microscopic images of Bodipy 558/568-C12 for lipid in mPHs (100 mM ethanol, 24 h plus 10  $\mu$ M CQ, 24 h; repeated 3 times with similar results). Scale bar: 10  $\mu$ m. **i** Heatmap of DEGs from GO analysis. The processes linked to mitochondrial function affected by *Ahr* HKO were obtained using the same data as in **(g)**. The top 15 genes of each pathway comprising the leading edge of the enrichment score are shown in the corresponding heat map (n=3 each; blue, downregulation; red, upregulation). **j** FACS assay in HepG2 cells (transfection with AhR plasmids for 48 h; 300  $\mu$ M oleic acid for 24 h; 30 nM Nile Red staining (*upper*) or 0.05  $\mu$ g/ml Rhodamine 123 (*lower*) for 30 min; repeated 3 times with similar results). **k** OCRs in mPHs (100 mM ethanol, 24 h). The real-time triplicate readings (*left*) and calculated mitochondrial respiration rates (*right*) are shown (n=3 each). The OCR was normalized to the cells counts in each well. Values are expressed as means  $\pm$  SEM. Significantly different compared to Con or WT. Data were analyzed via two-tailed Student’s t-test (**b-d**, and **k**) or one-way ANOVA with Tukey HSD (**e** and **f**). Source data are provided as a Source Data file.

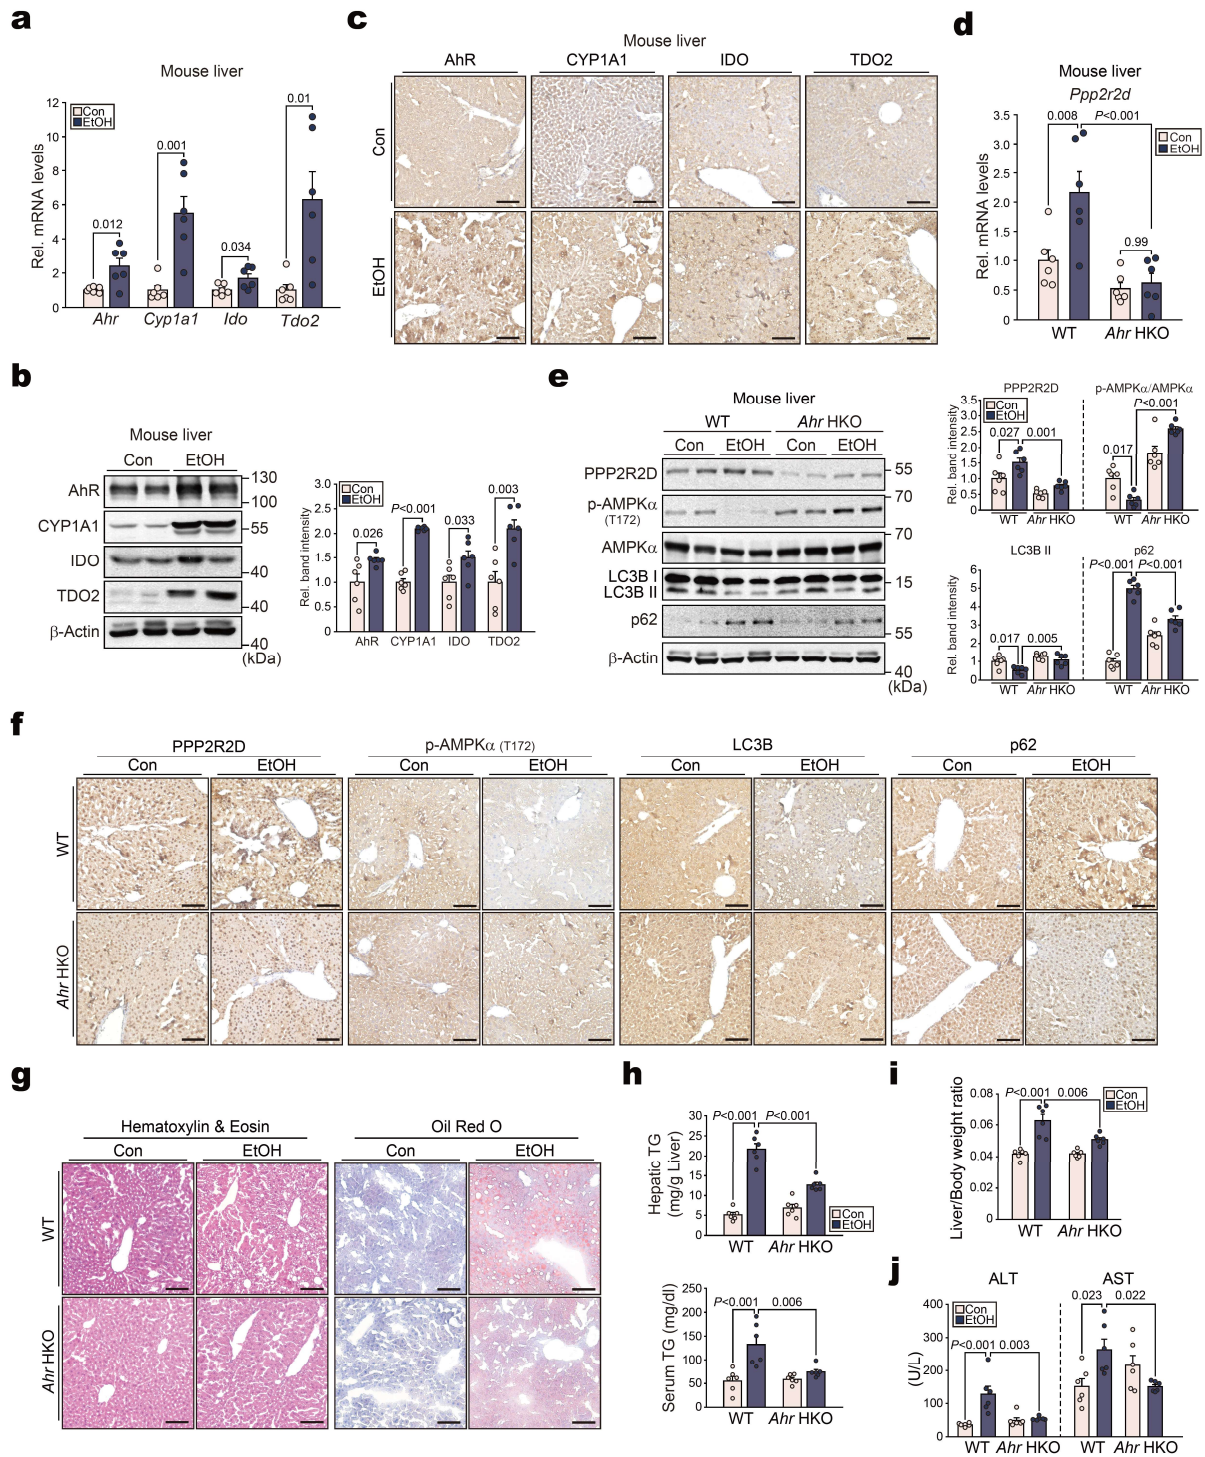

**Supplementary Fig. 7 Analyses of AhR effects on the identified targets and liver injury in chronic-binge alcohol model.**

**a-c** qRT-PCR, immunoblotting, and immunohistochemical analyses for AhR, CYP1A1, IDO, and TDO2 in the liver of mice fed a control or chronic-binge alcohol for 4 weeks (n=6 each). Representative

images were shown for (c). Scale bar: 100  $\mu\text{m}$ . **d** qRT-PCR assays for *Ppp2r2d* in the liver of WT and *Ahr* HKO mice fed as indicated in (a). (n=6 each). **e, f** Immunoblots and immunohistochemical analyses in the liver samples of the same mice as in (d) (n=6 each). Representative images were shown for (f). Scale bar: 100  $\mu\text{m}$ . **g** Representative H&E (*left*) or oil red O (*right*) staining in the liver of the same mice as in (d) (n=6 each). Scale bar: 100  $\mu\text{m}$ . **h** Hepatic (*upper*) or serum (*lower*) TG contents in the same mice as in (d) (n=6 each). **i, j** Liver-to-body weight ratios (**i**) and serum ALT and AST activities (**j**) in the same mice as in (d) (n=6 each). Values are expressed as means  $\pm$  SEM. Significantly different compared to Con or WT. Data were analyzed via two-tailed Student's t-test (a and b) or one-way ANOVA with Tukey HSD (d, e, and h-j). Source data are provided as a Source Data file.

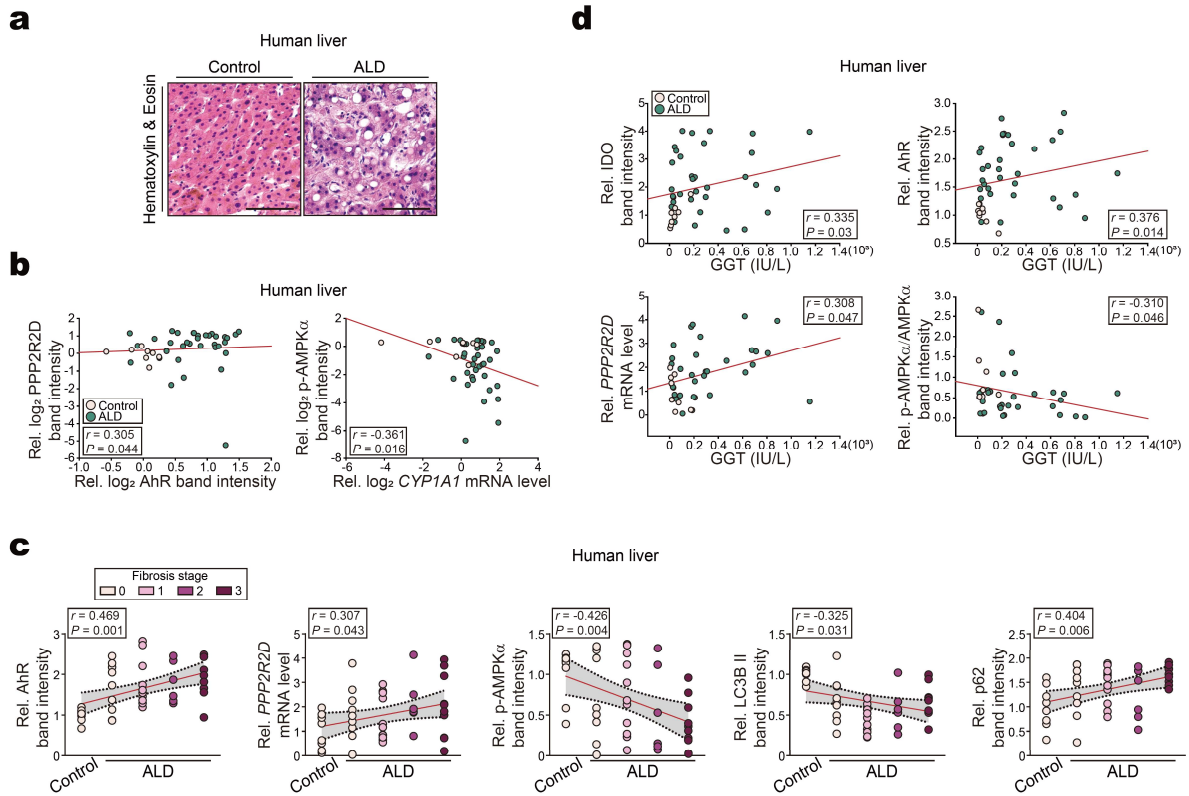

**Supplementary Fig. 8 H&E staining and correlation analyses among the identified targets in ALD patients.**

**a** Representative H&E staining in the same liver specimens as in Fig. 7d (control: n=5, ALD: n=7). Scale bar: 100  $\mu$ m. **b** Correlations between AhR (or CYP1A1) and PPP2R2D (or p-AMPK $\alpha$ ) using the same data as in Fig 7a or c. Each point represents one sample (control: n=8, ALD: n=36). **c** Linear regression analysis between fibrosis stage (0-3) and expression level of AhR (RMSE=0.517), PPP2R2D (RMSE=1.031), p-AMPK $\alpha$  (RMSE=0.428), LC3B II (RMSE=0.263), or p62 (RMSE=0.421) using the same data as in Fig 7a or c. The red line is the regression line, and the grey area between the black dotted lines indicates the 95% confidence intervals of the fit. Each point represents one sample (control: n=8, ALD: n=36). **d** Correlations between GGT and the indicated targets identified using the same data as in Fig 7a or c. Each point represents one sample (control: n=8, ALD: n=34). Data were analyzed via two-tailed Spearman correlation (**b** and **d**) or two-tailed Pearson correlation (**c**). Source data are provided as a Source Data file.



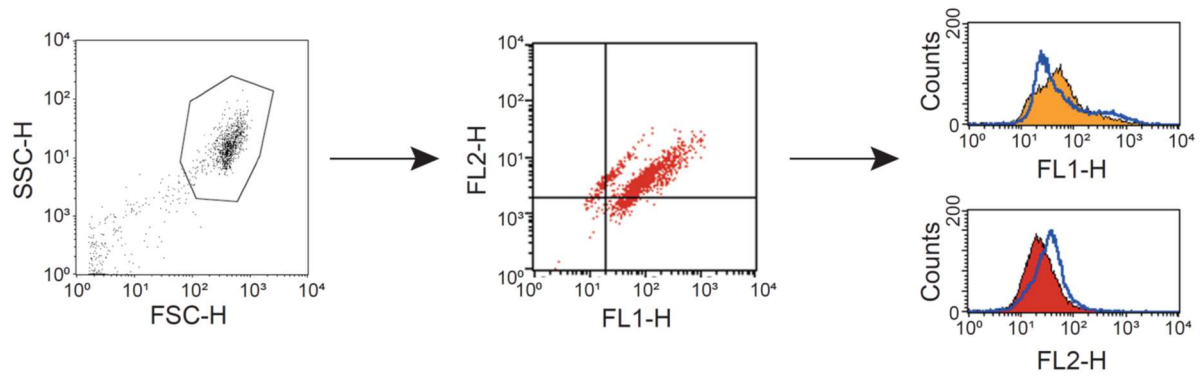

**Supplementary Fig. 9 Flow cytometry workflows.**

Rhodamine 123 (FL1-H) to assess mitochondrial function; Nile red (FL2-H) to assess lipid metabolism.

## SUPPLEMENTARY TABLES

**Supplementary Table 1 Clinical characteristics of control without ALD participants and patients with ALD.**

| Parameters                                         | Control<br>(without ALD)<br>(n=8) | ALD<br>(n=36) | P value             |
|----------------------------------------------------|-----------------------------------|---------------|---------------------|
| Age (years)                                        | 51.25 ± 4.64                      | 56.42 ± 1.81  | 0.247               |
| Gender (male/female)                               | 4/4                               | 32/4          | -                   |
| <sup>a</sup> BMI (kg/m <sup>2</sup> )              | 25.56 ± 0.87                      | 23.98 ± 1.03  | 0.329 <sup>#</sup>  |
| AST (IU/L)                                         | 26.63 ± 3.52                      | 78.39 ± 9.68  | 0.003 <sup>#</sup>  |
| ALT (IU/L)                                         | 23 ± 5.63                         | 67.5 ± 24.65  | 0.061 <sup>#</sup>  |
| <sup>b</sup> GGT (IU/L)                            | 50.63 ± 19.74                     | 303.5 ± 50.71 | 0.001 <sup>#</sup>  |
| <sup>b</sup> TG (mg/dL)                            | 110 ± 15.56                       | 135.9 ± 18.47 | 0.620 <sup>#</sup>  |
| <sup>c</sup> FFA (μEq/L)                           | 442.8 ± 89.67                     | 763.6 ± 94.69 | 0.098 <sup>#</sup>  |
| cholesterol (mg/dL)                                | 195.9 ± 10.42                     | 167.4 ± 9.65  | 0.186               |
| <sup>b</sup> HDL cholesterol (mg/dL)               | 62.13 ± 3.40                      | 51.21 ± 5.24  | 0.061 <sup>#</sup>  |
| Steatosis score                                    |                                   |               |                     |
| Grade 0                                            | n=8                               | n=10          |                     |
| Grade 1                                            |                                   | n=10          | -                   |
| Grade 2                                            |                                   | n=6           |                     |
| Grade 3                                            |                                   | n=10          |                     |
| Fibrosis score                                     |                                   |               |                     |
| Stage 0                                            |                                   | n=9           |                     |
| Stage 1                                            | -                                 | n=11          | -                   |
| Stage 2                                            |                                   | n=6           |                     |
| Stage 3                                            |                                   | n=10          |                     |
| <sup>a</sup> Bilirubin (mg/dL)                     | 0.86 ± 0.17                       | 2.7 ± 0.69    | 0.336 <sup>#</sup>  |
| <sup>a</sup> Albumin (g/dL)                        | 4.11 ± 0.10                       | 3.62 ± 0.09   | 0.008 <sup>#</sup>  |
| <sup>a</sup> Platelet count (×10 <sup>3</sup> /μl) | 198.9 ± 9.21                      | 156.1 ± 14.52 | 0.157               |
| <sup>d</sup> Insulin (uIU/ml)                      | 8.16 ± 1.31                       | 13.06 ± 1.83  | 0.158 <sup>#</sup>  |
| <sup>c</sup> HbA1c (%)                             | 5.46 ± 0.06                       | 6.15 ± 0.22   | 0.259 <sup>#</sup>  |
| <sup>c</sup> C-peptide (ng/ml)                     | 2.33 ± 0.26                       | 4.19 ± 0.67   | 0.261 <sup>#</sup>  |
| <sup>c</sup> CRP (mg/dL)                           | 0.06 ± 0.02                       | 1.01 ± 0.45   | 0.0002 <sup>#</sup> |
| <sup>a</sup> FBS (mg/dL)                           | 103 ± 4.21                        | 143.7 ± 8.42  | 0.005 <sup>#</sup>  |
| <sup>a</sup> ANC                                   | -                                 | 4377 ± 602.4  | -                   |
| <sup>a</sup> PT INR                                | -                                 | 1.86 ± 0.46   | -                   |
| <sup>a</sup> WBC (×10 <sup>3</sup> /μl)            | -                                 | 6.80 ± 0.63   | -                   |
| <sup>a</sup> Hb (g/dL)                             | -                                 | 12.25 ± 0.36  | -                   |

Data represent either n per group or mean ± SEM, and differences between groups are tested using two-

tailed Student's t-test or two-tailed Mann-Whitney<sup>#</sup> test. n=8 in control, and 36 in ALD unless noted. <sup>a</sup>n=32 in ALD; <sup>b</sup>n=34 in ALD; <sup>c</sup>n=31 in ALD; <sup>d</sup>n=30 in ALD; <sup>e</sup>n=7 in control, and 31 in ALD. ALD, alcoholic liver disease; ALT, alanine aminotransferase; AST, aspartate aminotransferase; BMI, body mass index; CRP, C-reactive protein; FBS, fasting blood sugar; FFA, free fatty acid; GGT,  $\gamma$ -glutamine transferase; Hb, hemoglobin; HbA1c, hemoglobin A1c; HDL, high density lipoprotein; PT INR, prothrombin time international normalized ratio; TG, triglyceride; and WBC, white blood cell.

**Supplementary Table 2 Clinical characteristics of control without ALD participants and patients with ALD according to the degree of steatosis.**

| Parameters                                         | Control<br>(without ALD)<br>(n=8) | Grade of hepatic steatosis |                   |                  |                   | P value |
|----------------------------------------------------|-----------------------------------|----------------------------|-------------------|------------------|-------------------|---------|
|                                                    |                                   | Grade 0<br>(n=10)          | Grade 1<br>(n=10) | Grade 2<br>(n=6) | Grade 3<br>(n=10) |         |
| Age (years)                                        | 51.25 ± 4.64                      | 61.4 ± 2.03                | 59 ± 3.7          | 48.33 ± 6.46     | 53.7 ± 2.31       | 0.107   |
| Gender (male/female)                               | 4/4                               | 10/0                       | 8/2               | 5/1              | 9/1               | -       |
| <sup>a</sup> BMI (kg/m <sup>2</sup> )              | 25.56 ± 0.87                      | 24.23 ± 1.11               | 26.81 ± 3.02      | 20.78 ± 1.51     | 23.44 ± 1.76      | 0.382   |
| AST (IU/L)                                         | 26.63 ± 3.52                      | 59.8 ± 23.78               | 60.1 ± 15.18      | 109 ± 10.34      | 96.9 ± 17.42      | 0.002   |
| ALT (IU/L)                                         | 23 ± 5.63                         | 106.5 ± 82.94              | 30.8 ± 5.76       | 53.33 ± 17.23    | 73.7 ± 34.08      | 0.103   |
| <sup>b</sup> GGT (IU/L)                            | 50.63 ± 19.74                     | 168.2 ± 67.81              | 377.3 ± 128.2     | 456.3 ± 141.8    | 267 ± 66.65       | 0.007   |
| <sup>c</sup> TG (mg/dL)                            | 110 ± 15.56                       | 169.1 ± 57.68              | 120.3 ± 18.6      | 173.8 ± 25.87    | 95.44 ± 6.99      | 0.313   |
| <sup>d</sup> FFA (μEq/L)                           | 442.8 ± 89.67                     | 973.4 ± 262.8              | 674.3 ± 100.4     | 442.3 ± 161.2    | 904 ± 195.6       | 0.115   |
| CHOL (mg/dL)                                       | 195.9 ± 10.42                     | 196.4 ± 21.66              | 168 ± 13.3        | 157.8 ± 26       | 143.5 ± 16.38     | 0.240   |
| <sup>e</sup> HDL (mg/dL)                           | 62.13 ± 3.40                      | 49.7 ± 5.95                | 56.2 ± 5.44       | 53.2 ± 20.63     | 46.22 ± 14.87     | 0.220   |
| Fibrosis                                           |                                   |                            |                   |                  |                   |         |
| Stage 0                                            |                                   | n=2                        | n=4               |                  | n=3               |         |
| Stage 1                                            | -                                 | n=4                        | n=3               | n=2              | n=2               | -       |
| Stage 2                                            |                                   | n=1                        | n=2               | n=1              | n=2               |         |
| Stage 3                                            |                                   | n=3                        | n=1               | n=3              | n=3               |         |
| <sup>e</sup> Bilirubin (mg/dL)                     | 0.86 ± 0.17                       | 0.99 ± 0.37                | 1.26 ± 0.61       | 3.8 ± 1.32       | 4.53 ± 1.84       | 0.008   |
| <sup>e</sup> Albumin (g/dL)                        | 4.11 ± 0.10                       | 3.9 ± 0.08                 | 3.88 ± 0.13       | 3.38 ± 0.22      | 3.34 ± 0.16       | 0.002   |
| <sup>e</sup> Platelet count (×10 <sup>3</sup> /μl) | 198.9 ± 9.21                      | 184.3 ± 33.88              | 190 ± 24.69       | 124.7 ± 43.57    | 124.7 ± 17.76     | 0.068   |
| <sup>f</sup> Insulin (uIU/ml)                      | 8.16 ± 1.31                       | 11.37 ± 2.54               | 13.56 ± 3.12      | 18.84 ± 8.39     | 10.66 ± 2.02      | 0.630   |
| <sup>d</sup> HbA1c (%)                             | 5.46 ± 0.06                       | 5.73 ± 0.24                | 5.76 ± 0.24       | 5.72 ± 0.3       | 7.14 ± 0.55       | 0.178   |
| <sup>g</sup> C-peptide (ng/ml)                     | 2.33 ± 0.26                       | 5.71 ± 2.22                | 3.79 ± 0.94       | 4.74 ± 1.40      | 3.04 ± 0.89       | 0.460   |
| <sup>d</sup> CRP (mg/dL)                           | 0.06 ± 0.02                       | 0.43 ± 0.22                | 0.27 ± 0.14       | 1.08 ± 0.24      | 2.14 ± 1.52       | 0.001   |
| <sup>e</sup> FBS (mg/dL)                           | 103 ± 4.21                        | 141.6 ± 10.64              | 130.7 ± 12.76     | 108.8 ± 10.39    | 177.9 ± 18.26     | 0.003   |
| <sup>e</sup> ANC                                   | -                                 | 3557 ± 579.6               | 3115 ± 397        | 5743 ± 1072      | 5267 ± 1706       | 0.163   |
| <sup>e</sup> PT INR                                | -                                 | 2.65 ± 1.48                | 2.32 ± 1.19       | 1.23 ± 0.14      | 1.26 ± 0.07       | 0.807   |
| <sup>e</sup> WBC (×10 <sup>3</sup> /μl)            | -                                 | 6.06 ± 0.75                | 5.84 ± 0.67       | 7.91 ± 1.01      | 7.52 ± 1.78       | 0.523   |
| <sup>e</sup> Hb (g/dL)                             | -                                 | 13.64 ± 0.37               | 12.33 ± 0.57      | 10.35 ± 1.15     | 12.33 ± 0.55      | 0.061   |

Data represent either n per group or mean  $\pm$  SEM, and continuous variables with the grade of hepatic steatosis are tested using Kruskal-Wallis test. <sup>a</sup>n=8 in Grade 0, and 8 in Grade 1; <sup>b</sup>n=9 in Grade 0, and 9 in Grade 1; <sup>c</sup>n=5 in Grade 2, and 9 in Grade 3; <sup>d</sup>n=7 in Grade 0, 9 in Grade 1, and 9 in Grade 3; <sup>e</sup>n=7 in Grade 0, and 9 in Grade 1; <sup>f</sup>n=7 in Grade 0, 9 in Grade 1, 5 in Grade 2, and 9 in Grade 3; <sup>g</sup>n=7 in control, 7 in Grade 0, 9 in Grade 1, and 9 in Grade 3. ALD, alcoholic liver disease; ALT, alanine aminotransferase; AST, aspartate aminotransferase; BMI, body mass index; CHOL, cholesterol; CRP, C-reactive protein; FBS, fasting blood sugar; FFA, free fatty acid; GGT,  $\gamma$ -glutamine transferase; Hb, hemoglobin; HbA1c, hemoglobin A1c; HDL, high density lipoprotein; PT INR, prothrombin time international normalized ratio; TG, triglyceride; WBC, white blood cell.

**Supplementary Table 3 Clinical characteristics of control without ALD participants and patients with ALD according to the degree of fibrosis.**

| Parameters                                         | Control                | Grade of fibrosis |                   |                  |                   | P value |
|----------------------------------------------------|------------------------|-------------------|-------------------|------------------|-------------------|---------|
|                                                    | (without ALD)<br>(n=8) | Stage 0<br>(n=9)  | Stage 1<br>(n=11) | Stage 2<br>(n=6) | Stage 3<br>(n=10) |         |
| Age (years)                                        | 51.25 ± 4.64           | 58.56 ± 4.30      | 57.91 ± 2.58      | 57.5 ± 1.75      | 52.2 ± 4.36       | 0.632   |
| Gender (male/female)                               | 4/4                    | 7/2               | 10/1              | 6/0              | 9/1               | -       |
| <sup>a</sup> BMI (kg/m <sup>2</sup> )              | 25.56 ± 0.87           | 22.54 ± 1.19      | 23.62 ± 1.40      | 26.6 ± 5.70      | 24.04 ± 1.15      | 0.785   |
| AST (IU/L)                                         | 26.63 ± 3.52           | 84.67 ± 28.27     | 56.55 ± 14.73     | 72.5 ± 13.87     | 100.3 ± 14.98     | 0.014   |
| ALT (IU/L)                                         | 23 ± 5.63              | 127 ± 91.2        | 27.18 ± 5.16      | 41.67 ± 4.24     | 73.8 ± 34.86      | 0.092   |
| <sup>b</sup> GGT (IU/L)                            | 50.63 ± 19.74          | 289.4 ± 73.26     | 308.8 ± 133       | 324.7 ± 99.84    | 296.7 ± 87.41     | 0.018   |
| <sup>c</sup> TG (mg/dL)                            | 110 ± 15.56            | 124.3 ± 19.05     | 113.5 ± 15.81     | 221 ± 111        | 127.8 ± 23.31     | 0.907   |
| <sup>d</sup> FFA (μEq/L)                           | 442.8 ± 89.67          | 740.4 ± 154.1     | 620.1 ± 151.2     | 958.2 ± 312.6    | 795.6 ± 180.2     | 0.376   |
| CHOL (mg/dL)                                       | 195.9 ± 10.42          | 197.7 ± 23.75     | 171.5 ± 13.77     | 153.2 ± 26.87    | 144.2 ± 14.56     | 0.148   |
| <sup>e</sup> HDL (mg/dL)                           | 62.13 ± 3.40           | 49.44 ± 10.72     | 50.64 ± 3.20      | 63.4 ± 23.22     | 46.89 ± 11.59     | 0.410   |
| Steatosis                                          |                        |                   |                   |                  |                   |         |
| Grade 0                                            | n=8                    | n=2               | n=4               | n=1              | n=3               |         |
| Grade 1                                            |                        | n=4               | n=3               | n=2              | n=1               | -       |
| Grade 2                                            |                        | n=0               | n=2               | n=1              | n=3               |         |
| Grade 3                                            |                        | n=3               | n=2               | n=2              | n=3               |         |
| <sup>e</sup> Bilirubin (mg/dL)                     | 0.86 ± 0.17            | 4.07 ± 2.65       | 1.5 ± 0.47        | 3 ± 1.58         | 2.63 ± 0.80       | 0.809   |
| <sup>e</sup> Albumin (g/dL)                        | 4.11 ± 0.10            | 3.57 ± 0.24       | 3.89 ± 0.07       | 3.48 ± 0.28      | 3.5 ± 0.13        | 0.038   |
| <sup>e</sup> Platelet count (×10 <sup>3</sup> /μl) | 198.9 ± 9.21           | 188.4 ± 19.9      | 184.2 ± 30.28     | 122 ± 31.08      | 128.6 ± 27.6      | 0.084   |
| <sup>f</sup> Insulin (uIU/ml)                      | 8.16 ± 1.31            | 9.83 ± 1.66       | 12.19 ± 2.66      | 17.92 ± 4.95     | 13.73 ± 4.72      | 0.361   |
| <sup>d</sup> HbA1c (%)                             | 5.46 ± 0.06            | 6.47 ± 0.56       | 6.36 ± 0.44       | 5.98 ± 0.50      | 5.79 ± 0.30       | 0.456   |
| <sup>g</sup> C-peptide (ng/ml)                     | 2.33 ± 0.26            | 3.19 ± 0.67       | 2.69 ± 0.66       | 5.90 ± 1.37      | 5.32 ± 1.88       | 0.193   |
| <sup>d</sup> CRP (mg/dL)                           | 0.06 ± 0.02            | 2.65 ± 1.95       | 0.39 ± 0.19       | 0.47 ± 0.19      | 0.70 ± 0.20       | 0.007   |
| <sup>e</sup> FBS (mg/dL)                           | 103 ± 4.21             | 149.9 ± 18.76     | 147.9 ± 15.37     | 136.2 ± 27.64    | 140.2 ± 12.76     | 0.065   |
| <sup>e</sup> ANC                                   | -                      | 5207 ± 2251       | 4680 ± 1053       | 3405 ± 318       | 4106 ± 761.9      | 0.974   |
| <sup>e</sup> PT INR                                | -                      | 2.74 ± 1.51       | 1.13 ± 0.04       | 2.99 ± 1.71      | 1.21 ± 0.06       | 0.653   |
| <sup>e</sup> WBC (×10 <sup>3</sup> /μl)            | -                      | 7.58 ± 2.37       | 7.31 ± 1.00       | 6.23 ± 0.64      | 6.14 ± 0.84       | 0.862   |
| <sup>e</sup> Hb (g/dL)                             | -                      | 12.63 ± 0.55      | 12.28 ± 0.56      | 12.7 ± 1.23      | 11.68 ± 0.71      | 0.844   |

Data represent either n per group or mean  $\pm$  SEM, and continuous variables with the stage of fibrosis are tested using Kruskal-Wallis test. <sup>a</sup>n=7 in Stage 0, 10 in Stage 1, and 5 in Stage 2; <sup>b</sup>n=8 in Stage 0, and 10 in Stage 1; <sup>c</sup>n=5 in Stage 2, and 9 in Stage 3; <sup>d</sup>n=7 in Stage 0, 9 in Stage 1, and 9 in Stage 3; <sup>e</sup>n=7 in Stage 0, and 9 in Stage 1; <sup>f</sup>n=7 in Stage 0, 9 in Stage 1, 5 in Stage 2, and 9 in Stage 3; <sup>g</sup>n=7 in control, 7 in Stage 0, 9 in Stage 1, and 9 in Stage 3. ALD, alcoholic liver disease; ALT, alanine aminotransferase; AST, aspartate aminotransferase; BMI, body mass index; CHOL, cholesterol; CRP, C-reactive protein; FBS, fasting blood sugar; FFA, free fatty acid; GGT,  $\gamma$ -glutamine transferase; Hb, hemoglobin; HbA1c, hemoglobin A1c; HDL, high density lipoprotein; PT INR, prothrombin time international normalized ratio; TG, triglyceride; and WBC, white blood cell.

**Supplementary Table 4 Primers for genotyping.**

| <b>Genes</b>               | <b>Forward</b>                                     | <b>Reverse</b>          |
|----------------------------|----------------------------------------------------|-------------------------|
| <i>Ahr<sup>fl/fl</sup></i> | CAGTGGGAATAAGGCAAGAGTGA<br>GTCACTCAGCATTACACTTTCTA | GGTACAAGTGCACATGCCTGC   |
| <i>Alb-Cre</i>             | GCGGTCTGGCAGTAAAACTATC                             | GTGAAACAGCATTGCTGTCACTT |



**Supplementary Table 5 Primers for qRT-PCR.**

| <b>Genes</b>          | <b>Forward</b>            | <b>Reverse</b>           |
|-----------------------|---------------------------|--------------------------|
| <i>18S RNA</i>        | GTAACCCGTTGAACCCCAT       | CCATCCAATCGGTAGTAGCG     |
| <i>β-Actin</i>        | CTGAGAGGGAAATCGTGCGT      | TGTTGGCATAGAGGTCTTTA     |
| <i>Ahr</i>            | AGGATCGGGTACCAGTTCA       | GTCAGTGGTCTCTGAGTGGC     |
| <i>Atp5d</i>          | GATGTCCTTCACCTTTGCCT      | AAGATGCCAAAGGCTCCAG      |
| <i>Atp5o</i>          | TCTCGACAGGTTTCGGAGCTT     | AGAGTACAGGGCGGTTGCATA    |
| <i>Cox5b</i>          | TTCAAGGTTACTTCGCGGAGT     | CGGGACTAGATTAGGGTCTTCC   |
| <i>Cox8a</i>          | CATCTTGACTCCCTGACCTTG     | CTTCGAGTGGACCTGAGC       |
| <i>Cycs</i>           | CCAAATCTCCACGGTCTGTTC     | ATCAGGGTATCCTCTCCCAG     |
| <i>Cyp1a1</i>         | GACACAGTGATTGGCAGAG       | GAAGGTCTCCAGAATGAAGG     |
| <i>Gapdh</i>          | AACGACCCCTTCATTGAC        | TCCACGACATACTCAGCAC      |
| <i>Ido</i>            | TGCTTACTCTCTTTCCCTTCC     | CATCAGACCTGGTGCTTCA      |
| <i>Ndufs1</i>         | AGGATATGTTTCGCACAACCTGG   | TCATGGTAACAGAATCGAGGGA   |
| <i>Ndufv2</i>         | GCAAGGAATTTGCATAAGACAGC   | TAGCCATCCATTCTGCCTTTG    |
| <i>Nrf1</i>           | GGAGCACTTACTGGAGTCC       | CTGTCCGATATCCTGGTGGT     |
| <i>Sqstm1</i>         | GGACCCATCTACAGAGGCTG      | ATCACAATGGTGGAGGGTGC     |
| <i>Pgc1α</i>          | ACGAGGCCAGTCCTTCCTCC      | AGCTCTGAGCAGGGACGTCT     |
| <i>Ppp2r2d</i>        | CGTGAACAAGAGAATAAAAGCCG   | CTTCAATATTGGGACCCGTAG    |
| <i>Ppp2r5c</i>        | TGACTTAGCACACCGCTCTC      | GACCTTCCTGGGTCTCATGC     |
| <i>Ppp2r5d</i>        | TGTTTCTCGTCCGTGTCCTG      | CTTGGGGCTGTGGGTCTTAG     |
| <i>Tdo2</i>           | CTGGGGGATCCTCAGGCTAT      | TGTCACTGTACTCGGCTGTG     |
| <i>Tfam</i>           | GCAAAGGATGATTCGGCTCAGGGAA | CCGGATCGTTTCACACTTCGACGG |
| <i>AHR</i>            | GACTGGACCCAAGTCCATCG      | TTGGTTGTGATGCCAAAGGA     |
| <i>CYP1A1</i>         | GGAGCTAGACACAGTGATTGGC    | GGTGAAGGGGACGAAGGA       |
| <i>IDO</i>            | TTCAGTGCTTTGACGTCCTG      | TGGAGGAACTGAGCAGCAT      |
| <i>PPP2R2D</i>        | CCGCAGCTACCCTGAAAGAA      | AACAGGGCCGATCGTTTCAT     |
| <i>TDO2</i>           | TGGGAACTACCTGCATTTGGA     | TCGGTGCATCCGAGAAACAA     |
| <i>MtCoxI</i>         | ACTATACTACTAACAGACCG      | GGTTCTTTTTTCCGGAGTA      |
| <i>Nuclear Rip140</i> | TCCCCGACACGAAAAAGAAAG     | ACATCCATTCAAAGCCCAGG     |
| (ChIP) AHRE1          | CCCTGAAAACAGCTTCCTGC      | CGTCTGGTTCCACCTCGTTG     |
| (ChIP) AHRE2          | CGAGGTGGAACCAGACGTATTT    | TTGGGCGGCTGCTAGAAATG     |

# Uncropped blots/gels

## S1d

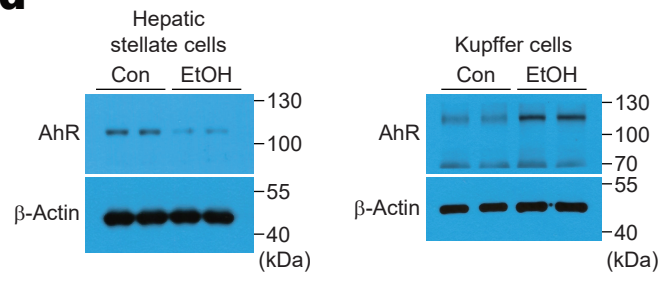

# Uncropped blots/gels

**S2a**

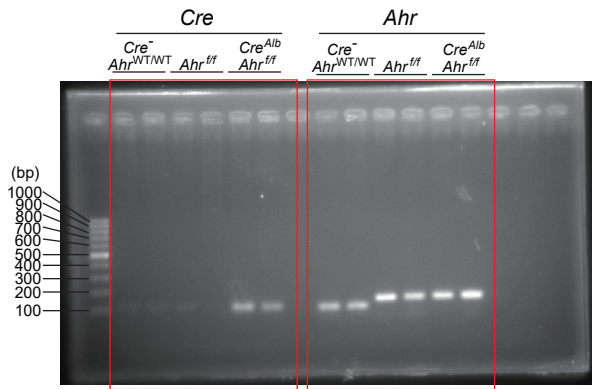

**S2b**

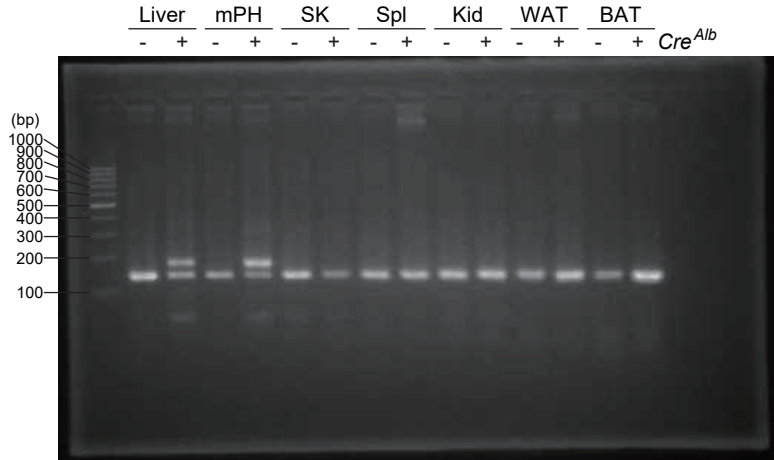

**S2c**

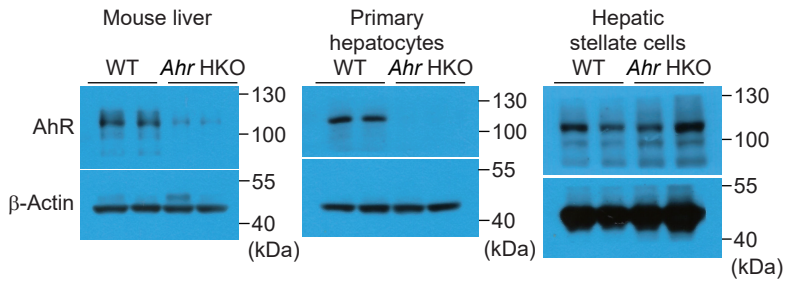

**S2g**

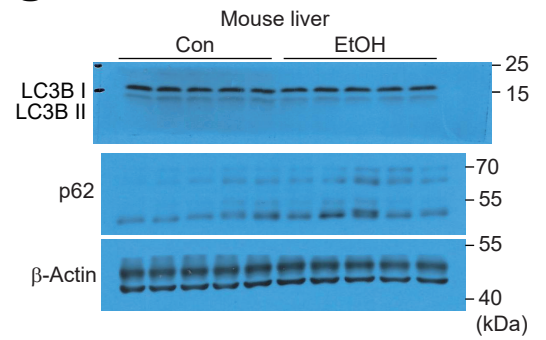

# Uncropped blots/gels

## S2j

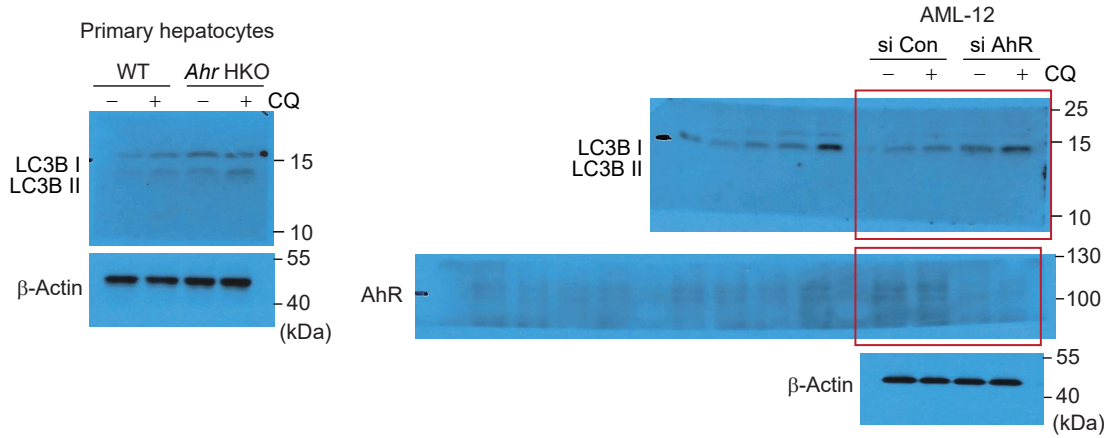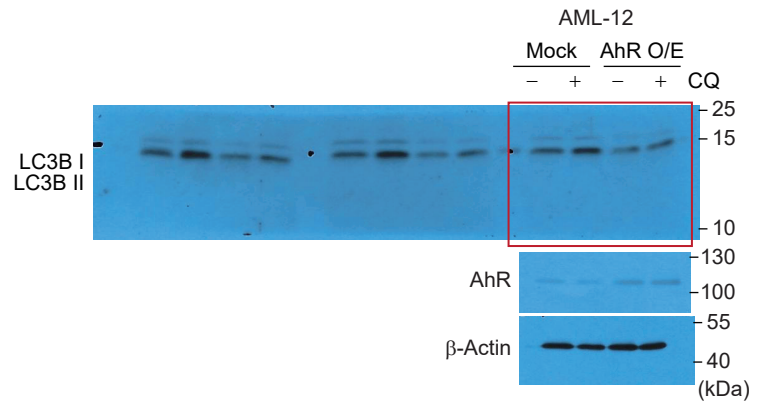

## S2k

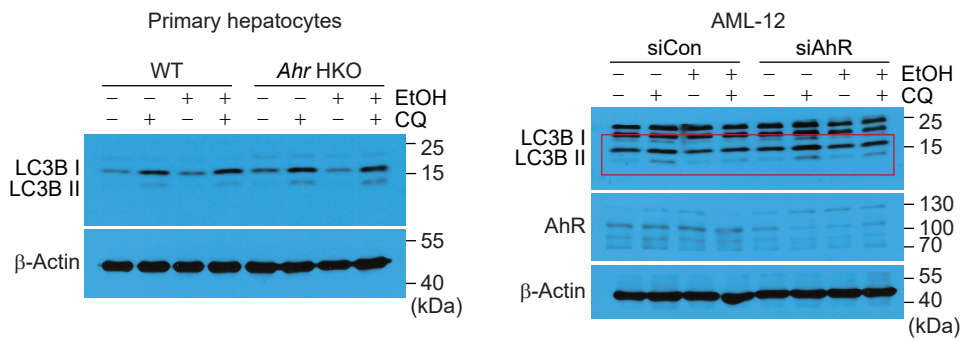

# Uncropped blots/gels

## S3a

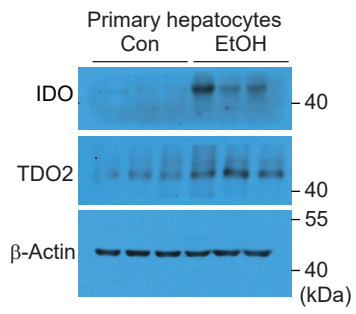

## S3f

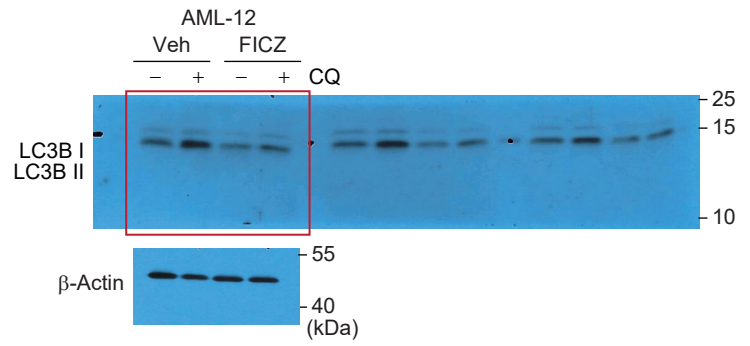

## S3g

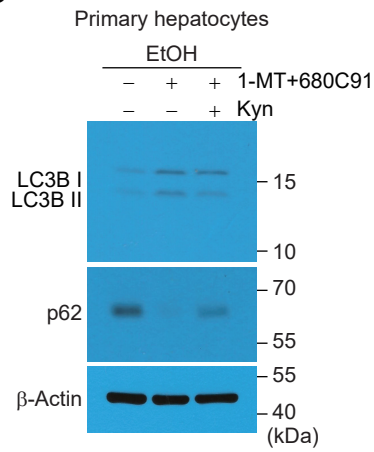

# Uncropped blots/gels

**S4b**

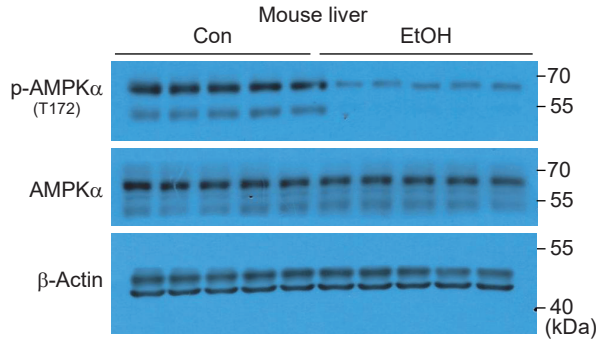

**S4d**

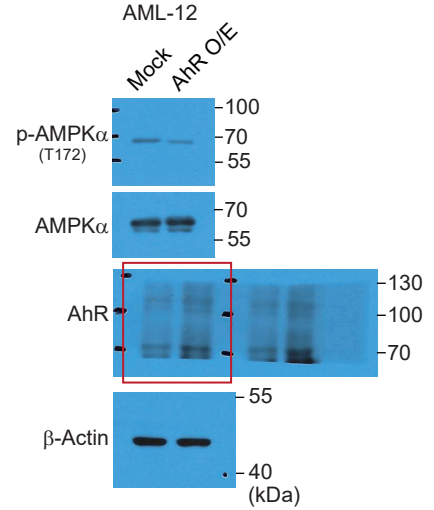

**S4c**

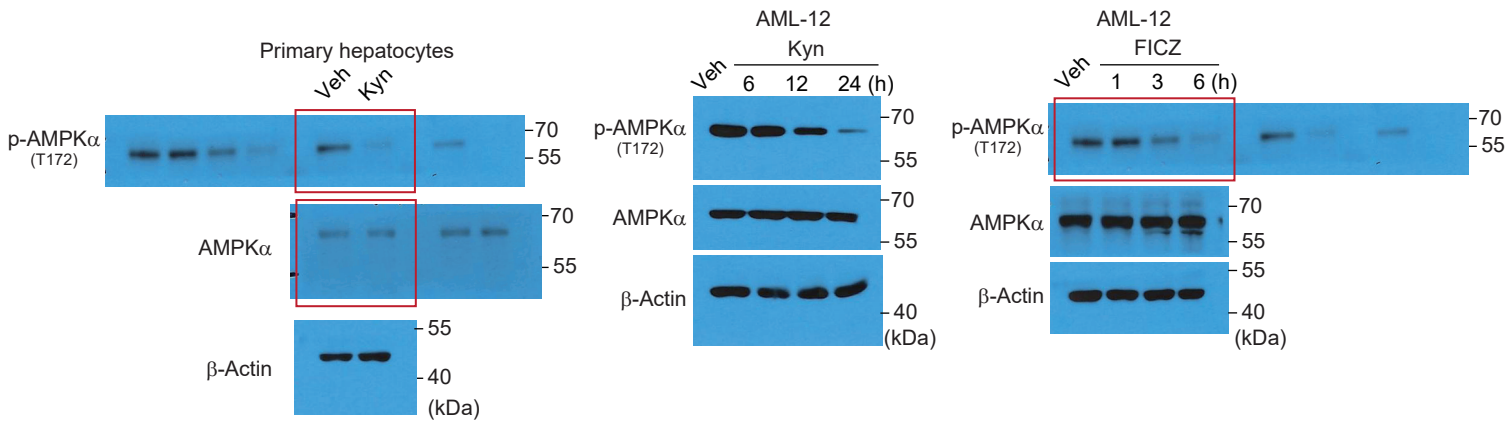

**S4e**

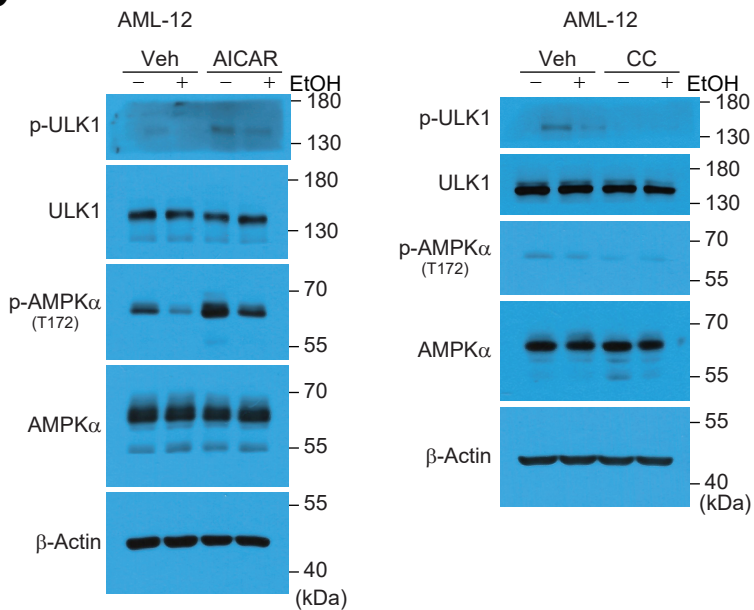

**S4f**

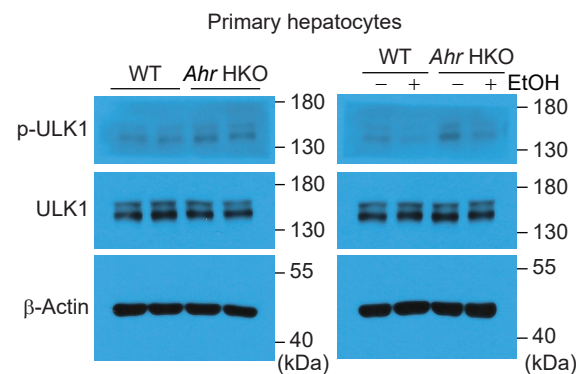

# Uncropped blots/gels

**S5a**

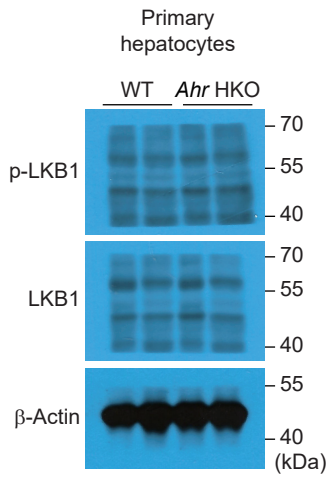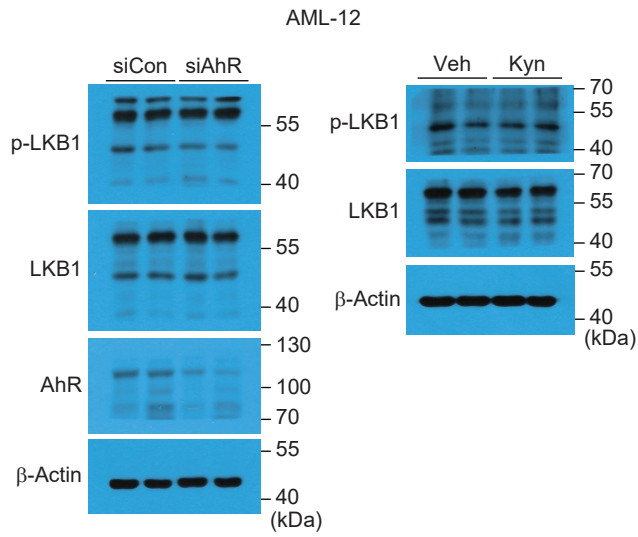

**S5c**

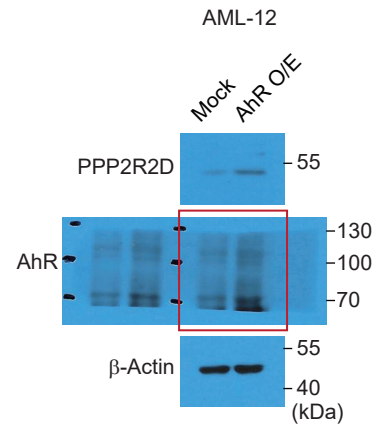

**S5e**

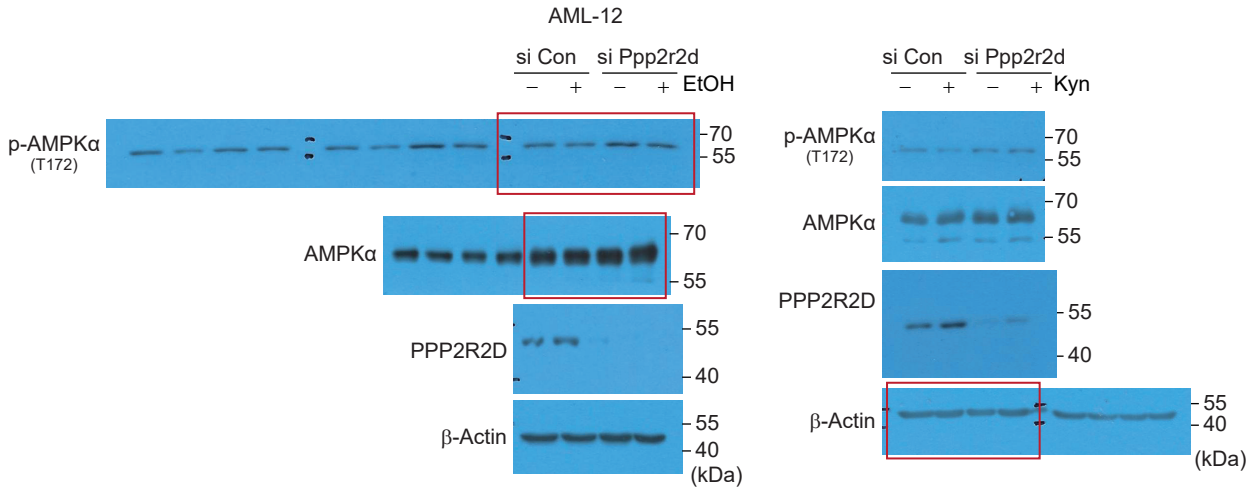

**S5d**

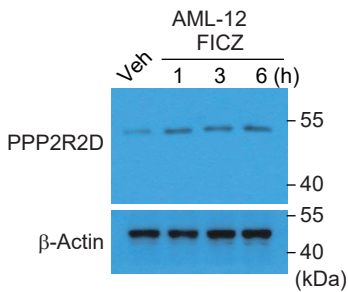

**S5f**

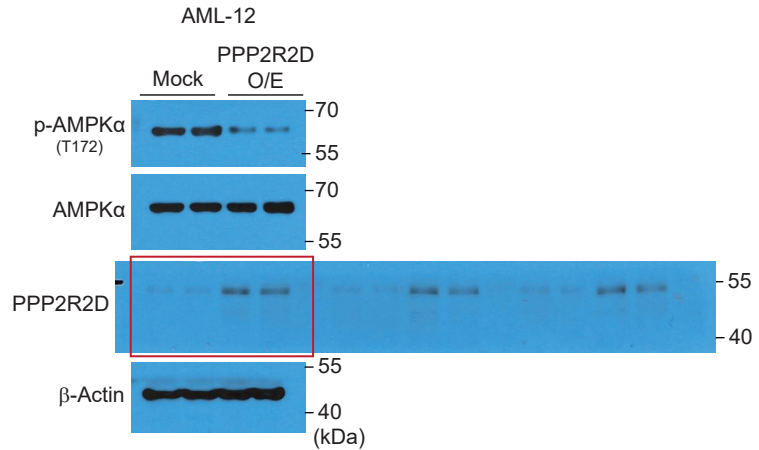

# Uncropped blots/gels

## S5g

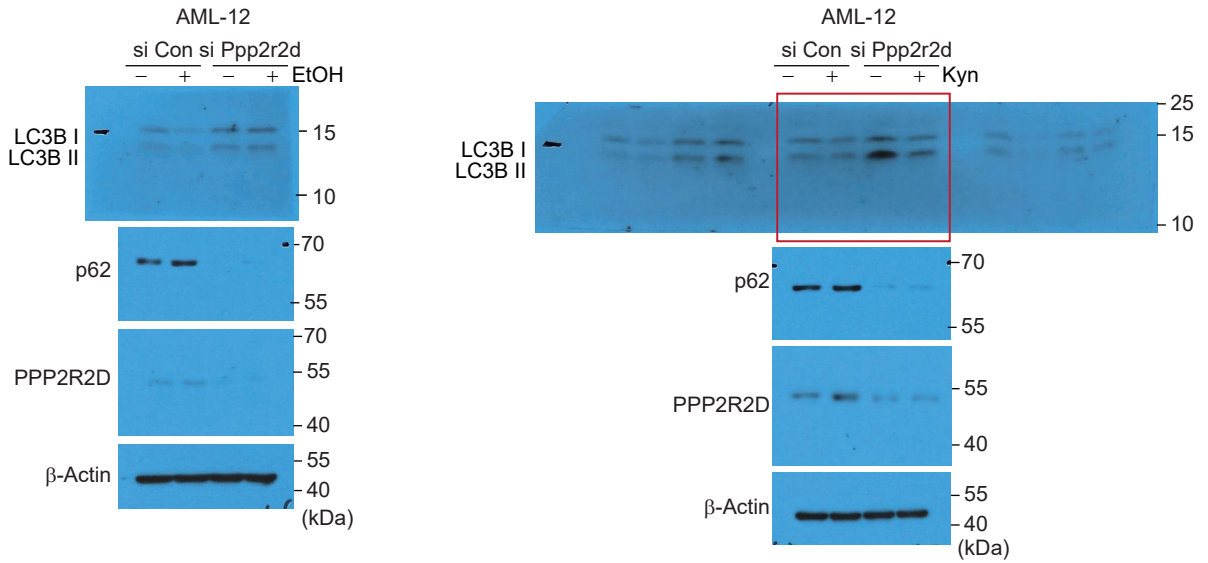

## S5h

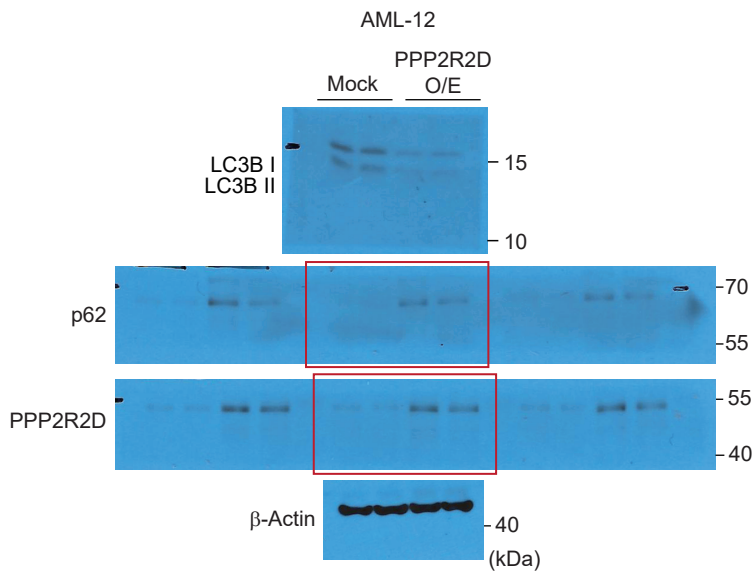

## S5j

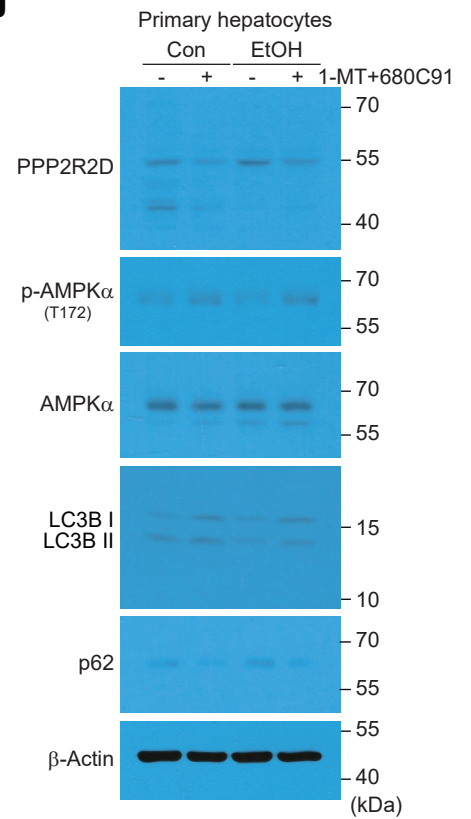



# Uncropped blots/gels

## S7b

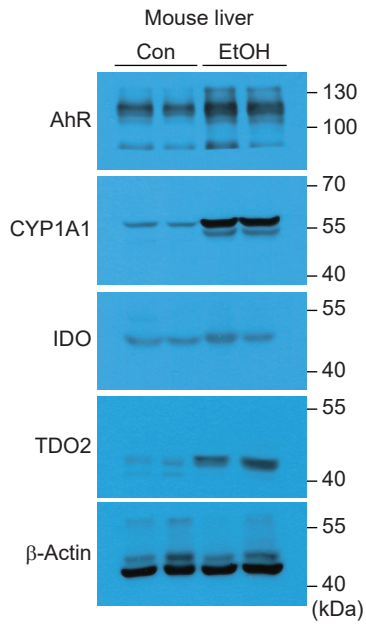

## S7e

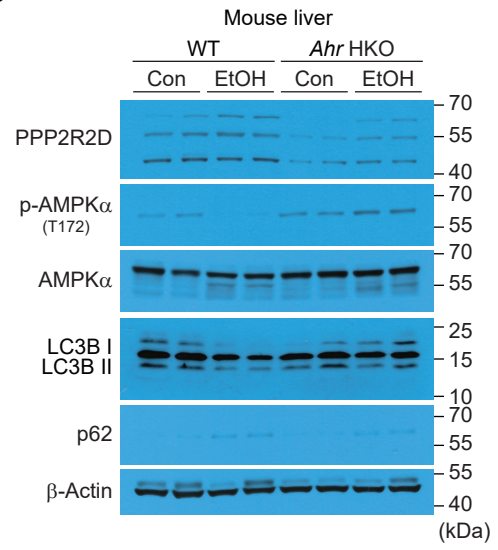

Supplement: 41467_2022_33749_MOESM1_ESM.pdf [file 41467_2022_33749_MOESM1_ESM.pdf]
