# Supplementary material for: Induction of the hepatic aryl hydrocarbon receptor by alcohol dysregulates autophagy and phospholipid metabolism via PPP2R2D
Source: PubMed Central journal article supplement (PMC9568535; doi:10.1038/s41467-022-33749-0), 2022-10-14
Supplement: 41467_2022_33749_MOESM3_ESM.pdf [file 41467_2022_33749_MOESM3_ESM.pdf]

## **Description of Additional Supplementary Files**

File Name: Supplementary Data 1

Description: Metabolomics and lipidomics raw data of mice livers or sera, related to Figure 3, 6 and Supplementary Figure 3.
